# **E proteins differentially co-operate with proneural bHLH transcription factors to sharpen neurogenesis**

Gwenvael Le Dréau<sup>1,#,\*</sup>, René Escalona<sup>1,4,#</sup>, Raquel Fueyo<sup>2</sup>, Antonio Herrera<sup>3</sup>, Juan D. Martínez<sup>1</sup>, Susana Usieto<sup>1</sup>, Anghara Menendez<sup>3</sup>, Sebastián Pons<sup>3</sup>, Marian A. Martínez-Balbás<sup>2</sup> and Elisa Martí<sup>1,\*</sup>

<sup>1</sup> Department of Developmental Biology, <sup>2</sup> Department of Molecular Genomics, <sup>3</sup> Department of Cell Biology, Instituto de Biología Molecular de Barcelona - CSIC, Parc Científic de Barcelona, C/ Baldori Reixac 10-15, Barcelona 08028, Spain.

<sup>4</sup> Current address: Departamento de Embriología, Facultad de Medicina, Universidad Nacional Autónoma de México, Ciudad de México 04510, México.

# These authors contributed equally to this work

\* Corresponding authors: [gldbmc@ibmb.csic.es](mailto:gldbmc@ibmb.csic.es); [emgbmc@ibmb.csic.es](mailto:emgbmc@ibmb.csic.es)

Tel: 34-934034972

Fax: 34-934034979

Key words: proneural proteins; E proteins; bHLH; neurogenesis; neuronal differentiation; spinal cord; cerebral cortex; ID proteins; Bone morphogenetic proteins (BMPs).

Word count (main text): 4,727

30

## **Abstract**

31 Basic HLH proteins heterodimerize with class I HLH/E proteins to  
32 promote transcription. Here we show that E proteins differentially co-operate with  
33 proneural bHLH transcription factors sharpening their neurogenic activity. We find  
34 that inhibiting BMP signaling or its target ID2, in the chick embryo spinal cord, impairs  
35 the neuronal production from progenitors expressing ATOH1/ASCL1, but less severely  
36 that from progenitors expressing NEUROG1/2/PTF1a. We define the mechanisms of  
37 this differential response as a dual co-operation of E proteins with proneural proteins. E  
38 proteins synergize with bHLH proteins when acting on CAGSTG motifs, thereby  
39 facilitating the neurogenic activity of ASCL1/ATOH1 which preferentially bind to such  
40 motifs. Conversely, E proteins restrict the strong neurogenic potential of NEUROG1/2  
41 by directly inhibiting their preferential binding to CADATG motifs. Since we find this  
42 mechanism to be conserved in corticogenesis, we propose this dual co-operation of E  
43 proteins with bHLH proteins as a novel though general feature of their mechanism of  
44 action.

45

46

47

## **Introduction**

48       The correct functioning of the vertebrate central nervous system (CNS) relies on the  
49 activity of a large variety of neurons that can be distinguished by their morphologies,  
50 physiological characteristics and anatomical locations (Zeng & Sanes, 2017). Such  
51 heterogeneity is generated during the phase of neurogenesis, once neural progenitors  
52 have been regionally specified and are instructed to exit the cell cycle and differentiate  
53 into discrete neuronal subtypes (Guillemot, 2007).

54       Neuronal differentiation and subtype specification are brought together by a small  
55 group of transcription factors (TFs) encoded by homologues of the *Drosophila* gene  
56 families *Atonal*, *Achaete-Scute*, *Neurogenins/dTap* and *p48/Ptf1a/Fer2* (Bertrand et al,  
57 2002; Huang et al, 2014). These TFs represent a subgroup of the class II of helix-loop-  
58 helix proteins and all share a typical basic helix-loop-helix (bHLH) structural motif,  
59 where the basic domain mediates direct DNA binding to CANNTG sequences (known  
60 as E-boxes) and the HLH region is responsible for dimerization and protein-protein  
61 interactions (Bertrand et al, 2002; Massari & Murre, 2000). They are generally  
62 expressed in mutually exclusive populations of neural progenitors along the rostral-  
63 caudal and dorsal-ventral axes (Gowan et al, 2001; Lai et al, 2016). They are typically  
64 referred to as proneural proteins, since they are both necessary and sufficient to switch  
65 on the genetic programs that drive pan-neuronal differentiation and neuronal subtype  
66 specification during development (Guillemot, 2007). This unique characteristic is also  
67 illustrated by their ability to reprogram distinct neural and non-neural cell types into  
68 functional neurons (Masserdotti et al, 2016).

69       Regulating the activity of these proneural proteins is crucial to ensure the production  
70 of appropriate numbers of neurons without prematurely depleting the pools of neural  
71 progenitors. In cycling neural progenitors, the transcriptional repressors HES1 and

72 HES5 act in response to Notch signalling to maintain proneural TF transcripts  
73 oscillating at low levels (Imayoshi & Kageyama, 2014). The proneural proteins are also  
74 regulated at the post-translational level. Ubiquitination and phosphorylation have been  
75 reported to control their stability, modify their DNA binding capacity or even terminate  
76 their transcriptional activity (Ali et al, 2011; Ali et al, 2014; Li et al, 2012; Quan et al,  
77 2016). Furthermore, the activity of these proneural proteins is highly dependent on  
78 protein-protein interactions, and particularly on their dimerization status. It is generally  
79 admitted that these TFs must form heterodimers with the more broadly expressed class I  
80 HLH/E proteins in order to produce their transcriptional activity (Wang & Baker, 2015).  
81 In this way, the activity of proneural proteins can be controlled by upstream signals that  
82 regulate the relative availability of E proteins. Members of the Inhibitor of DNA  
83 binding (ID) family represent such regulators. As they lack the basic domain required  
84 for direct DNA-binding, ID proteins sequester E proteins through a physical interaction  
85 and thereby produce a dominant-negative effect on proneural proteins (Massari &  
86 Murre, 2000; Wang & Baker, 2015). Hence, several sophisticated regulatory  
87 mechanisms are available during development to control proneural protein activity and  
88 fine-tune neurogenesis.

89 Bone morphogenetic proteins (BMPs) contribute to multiple processes during the  
90 formation of the vertebrate CNS (Le Dreau & Marti, 2013; Liu & Niswander, 2005).  
91 Yet it is only in the past few years that their specific role in controlling vertebrate  
92 neurogenesis has begun to be defined (Choe et al, 2013; Le Dreau et al, 2012; Le Dreau  
93 et al, 2014; Segklia et al, 2012). During spinal cord development, SMAD1 and SMAD5,  
94 two canonical TFs of the BMP pathway (Massague et al, 2005), dictate the mode of  
95 division that spinal progenitors adopt during primary neurogenesis. Accordingly, strong  
96 SMAD1/5 activity promotes progenitor maintenance while weaker activity enables

97 neurogenic divisions to occur (Le Dreau et al, 2014). This model explains how  
98 inhibition of BMP7 or SMAD1/5 activity provokes premature neuronal differentiation  
99 and the concomitant depletion of progenitors. However, it does not explain why the  
100 generation of distinct subtypes of dorsal interneurons are affected differently (Le Dreau  
101 et al, 2012), nor how BMP signaling affects the activity of the proneural proteins  
102 expressed in the corresponding progenitor domains.

103 Here, we have investigated these questions, extending our analysis to primary spinal  
104 neurogenesis along the whole dorsal-ventral axis. As such, we identified a striking  
105 correlation between the requirement of canonical BMP activity for the generation of a  
106 particular neuronal subtype and the proneural protein expressed in the corresponding  
107 progenitor domain. Inhibiting the activity of BMP7, SMAD1/5 or their downstream  
108 effector ID2 strongly impaired the production of neurons by spinal progenitors  
109 expressing either ATOH1 or ASCL1 alone, while it had a much weaker effect on the  
110 generation of the neuronal subtypes derived from progenitors expressing NEUROG1,  
111 NEUROG2 or PTF1a. We found that this differential responsiveness originates from a  
112 dual, E-box dependent mode of co-operation of the class I HLH/E proteins with the  
113 proneural proteins. E proteins interact with proneural proteins to aid their interaction  
114 with CAGSTG E-boxes, facilitating the ability of ASCL1 and ATOH1 to promote  
115 neurogenic divisions and hence, neuronal differentiation. Conversely, E proteins inhibit  
116 proneural protein binding to CADATG motifs, consequently restraining the ability of  
117 NEUROG1/2 that preferentially bind to these motifs to trigger neurogenic division and  
118 promote neuronal differentiation. Similar results were obtained in the context of  
119 corticogenesis, suggesting that this differential co-operation of E proteins with the  
120 distinct proneural proteins is a general feature of their mode of action.

121

## Results

122 **The canonical BMP pathway differentially regulates the generation of spinal**  
123 **neurons derived from progenitors expressing ASCL1/ATOH1 or**  
124 **NEUROG1/NEUROG2/PTF1a**

125 We previously reported that BMP7 signalling through its canonical effectors  
126 SMAD1 and SMAD5, is differentially required for the generation of the distinct  
127 subtypes of dorsal spinal interneurons (Figure 1A and Le Dreau et al, 2012). Here, we  
128 extend this analysis to the generation of neuronal subtypes produced in the ventral part  
129 of the developing chick spinal cord. Inhibiting BMP7 or SMAD1/5 expression by *in ovo*  
130 electroporation of specific sh-RNA-encoding plasmids at stage HH14-15 produced a  
131 significant reduction in the generation of p2-derived Chx10<sup>+</sup> (V2a) and Gata3<sup>+</sup>(V2b)  
132 subtypes 48 hours post-electroporation (hpe), whereas Evx1<sup>+</sup> (V0v), En1<sup>+</sup> (V1)  
133 interneurons and Isl1<sup>+</sup> motoneurons were not significantly affected (Figure 1-figure  
134 supplement 1). These results revealed a correlation whereby the requirement of the  
135 canonical BMP pathway for the generation of discrete spinal neuron subtypes is linked  
136 to the proneural protein expressed in the corresponding progenitor domain (Figure  
137 1B,C). The neuronal subtypes strongly affected by BMP7/SMAD1/5 inhibition (dI1,  
138 dI3, dI5: Figure 1B,C) were generated from spinal progenitors expressing ATOH1  
139 (dP1) or ASCL1 alone (dP3, dP5). By contrast, all the neuronal subtypes deriving from  
140 spinal progenitors expressing either NEUROG1 alone (dP2, dP6-p1) or NEUROG2  
141 (pMN) were much less severely affected (Figure 1B,C). Intriguingly, the V2a/b  
142 interneurons that display intermediate sensitivity to BMP7/SMAD1/5 inhibition are  
143 derived from p2 progenitors that express both ASCL1 and NEUROG1 (Misra et al,  
144 2014), while the relatively insensitive dI4 interneurons are derived from dP4

145 progenitors that express PTF1a together with low levels of ASCL1 (Glasgow et al,  
146 2005).

147 These correlations were particularly interesting in view of recent genome-wide  
148 ChIPseq studies that identified the optimal E-box (CANNTG) motifs bound by these  
149 TFs: ATOH1 and ASCL1 both preferentially bind to CAGCTG E-boxes (Borromeo et  
150 al, 2014; Castro et al, 2011; Klisch et al, 2011; Lai et al, 2011), whereas the optimal  
151 motif for NEUROGs is CADATG (where D stands for A, G or T: see Madelaine &  
152 Blader, 2011; Seo et al, 2007). Interestingly, most of the E-boxes bound by PTF1a in  
153 the developing spinal cord correspond to the CAGCTG motif favored by ASCL1 and  
154 ATOH1, yet PTF1a can bind to the NEUROG-like CAGATG motifs in a significant  
155 proportion of its targets genes (Borromeo et al, 2014). These observations suggested  
156 that the sensitivity of a given progenitor domain to canonical BMP activity originates  
157 from the intrinsic DNA-binding preferences of the different proneural bHLH TFs  
158 (Figure 1D). In many cell contexts, BMP signaling is mediated by ID proteins  
159 (Genander et al, 2014; Hollnagel et al, 1999; Moya et al, 2012), which physically  
160 sequester class I HLH/E proteins to produce a dominant-negative effect on proneural  
161 proteins (Figure 1D). While this hypothetical signaling cascade could explain the  
162 response of spinal progenitors expressing ASCL1 or ATOH1 to altered canonical BMP  
163 activity, it would not explain the relative insensitivity of the progenitors expressing  
164 NEUROG1, NEUROG2 or PTF1a. Therefore, we tested the veracity of these functional  
165 relationships to identify the basis of this differential response (Figure 1D).

166

167 **ID2 acts downstream of the canonical BMP pathway to differentially regulate the**  
168 **generation of spinal neurons derived from progenitors expressing ASCL1/ATOH1**  
169 **or NEUROG1/NEUROG2/PTF1a**

170 To test whether ID proteins are involved in canonical BMP signalling during spinal  
171 neurogenesis, we focused on ID2 (Figure 2A), not least because canonical BMP  
172 signalling is necessary and sufficient to promote *cId2* expression in the developing  
173 spinal cord (Figure 2-figure supplement 1 and Le Dreau et al, 2014). Moreover, *cId2*  
174 expression closely overlaps that described for the canonical BMP activity: restricted to  
175 the dorsal spinal cord early during patterning and later spreading ventrally within the  
176 ventricular zone during neurogenesis (Figure 2B-D and Le Dreau et al, 2012; Le Dreau  
177 et al, 2014). Inhibition of endogenous ID2 activity was triggered by *in ovo*  
178 electroporation of a sh-RNA specifically targeting chick *Id2* transcripts (sh-Id2, Figure  
179 2-figure supplement 2A-E). This ID2 inhibition caused premature cell-autonomous  
180 differentiation at 48 hpe similar to that provoked by inhibiting SMAD1/5 (Figure 2E-K  
181 and Le Dreau et al, 2014). Conversely, overexpression of a murine ID2 construct  
182 reduced the proportion of electroporated cells that differentiated into neurons (Figure  
183 2H,K and Figure 2-figure supplement 2F,G). ID2 overexpression could also partially  
184 impede the premature differentiation caused by both sh-Id2 and sh-Smad5 (Figure 2I-  
185 K). Similar results were obtained when measuring the activity of the pTubb3:luc  
186 reporter 24 hpe (Figure 2L).

187 We next analysed the consequences of ID2 inhibition on the generation of the  
188 different subtypes of spinal neurons, detecting a significant dose-dependent reduction in  
189 the generation of many neuronal subtypes (Figure 2M,N). The overall phenotype caused  
190 by ID2 inhibition was comparable to that triggered by inhibiting BMP7, SMAD1 or  
191 SMAD5: the neuronal subtypes deriving from progenitor domains expressing either  
192 ATOH1 or ASCL1 alone were globally more sensitive to ID2 inhibition than those  
193 derived from progenitor domains expressing NEUROG1, NEUROG2 or PTF1a (Figure  
194 2O). Together, these results confirmed that ID2 acts downstream of the canonical BMP



195 pathway in spinal neurogenesis and that it regulates distinctly the generation of spinal  
196 neurons derived from progenitors expressing ASCL1/ATOH1 and  
197 NEUROG1/NEUROG2.

198

### 199 **ID2 and E proteins counterbalance each other's activity during spinal** 200 **neurogenesis**

201 We wondered whether ID2 contributes to spinal neurogenesis by sequestering E  
202 proteins (Figure 3A). Thus, we analysed the expression of these class I HLH genes  
203 during spinal neurogenesis. Transcripts from the *cTcf3/E2A* gene, which encodes the  
204 E12 or E47 alternative splice isoforms (Murre et al, 1989), were readily detected in the  
205 ventricular zone throughout the dorsal-ventral axis of the developing spinal cord, with  
206 apparently no domain-specific pattern (Figure 3B and Holmberg et al, 2008).  
207 Transcripts from the chicken HEB orthologue *cTcf12* were detected in the transition  
208 zone, following a dorsal-to-ventral gradient (Figure 3C). Previous studies reported that  
209 *E2-2* transcripts were barely detected in the developing murine spinal cord (Sobrado et  
210 al, 2009).

211 The overexpression of E47 or TCF12 both produced a significant increase in the  
212 proportion of differentiated cells, a phenotype that was reverted by the concomitant  
213 electroporation of ID2 (Figure 3D-J). To inhibit the endogenous activity of E proteins,  
214 we took advantage of an E47 construct carrying mutations in its basic domain (E47bm)  
215 that acts in a dominant-negative manner over E proteins *in vivo* (Zhuang et al, 1998).  
216 Electroporation of E47bm inhibited neuronal differentiation in a cell autonomous  
217 manner, and it fully compensated for the premature differentiation caused by both E47  
218 and TCF12 (Figure 3-figure supplement 1). The E47bm construct also rescued to a large  
219 extent the premature differentiation triggered by sh-Id2 (Figure 3K-O). Together, these

220 results appear to confirm that the role played by ID2 during spinal neurogenesis  
221 depends on its ability to sequester E proteins.

222

223 **E47 co-operates distinctly with ASCL1/ATOH1 and NEUROG1/NEUROG2 to**  
224 **fine-tune neurogenic divisions during spinal neurogenesis**

225 The results we obtained so far suggested that E proteins themselves might co-operate  
226 differently with the distinct proneural proteins during spinal neurogenesis (Figure 4A).  
227 To test this hypothesis, we first analyzed the consequences of expressing the mutant  
228 E47bm on the generation of spinal neuron subtypes. There was a marked reduction ( $\geq$   
229 50%) in the generation of Lhx2/9<sup>+</sup> (dI1) and Tlx3<sup>+</sup> (dI3/dI5) interneurons, which derive  
230 respectively from progenitors expressing ATOH1 and ASCL1 alone (Figure 4B,C,F).  
231 By contrast, electroporation of E47bm affected to a lesser extent (<25%) the generation  
232 of Lhx1/5<sup>+</sup> (dI2/dI4/dI6-V1) or Isl1<sup>+</sup> (MN) neuronal subtypes deriving from  
233 progenitors expressing NEUROG1 alone (dP2, dP6-V1), PTF1a (dP4) or NEUROG2  
234 (pMN, Figure 4D-F). Hence, ATOH1 and ASCL1 appeared to be much more dependent  
235 on the activity of E proteins than NEUROG1, NEUROG2 and PTF1a to promote  
236 appropriate neuronal differentiation.

237 Next, we evaluated how E47 gain-of-function would modulate the neuronal  
238 differentiation induced when ASCL1, ATOH1, NEUROG1 and NEUROG2 are  
239 overexpressed (Figure 4G-O). From 24 hpe onwards, all 4 proneural bHLH proteins  
240 caused premature differentiation in a cell-autonomous and concentration dependent  
241 manner (Figure 4-figure supplement 1A-C). The presence of E47 accentuated the mild  
242 increase in neuronal differentiation provoked by ASCL1 at 24 hpe, and more  
243 significantly at 48 hpe (Figure 4G-H'). Accordingly, E47 provoked a significant  
244 reduction in the average number of electroporated cells generated 48 hpe of ASCL1

245 (Figure 4O). A similar tendency, albeit less pronounced, was observed when E47 was  
246 combined with ATOH1, especially in terms of the reduced average number of EP<sup>+</sup> cells  
247 generated 48 hpe (Figure 4I-J',O). Addition of E47 had the opposite effect when  
248 combined with NEUROG1 or NEUROG2: it significantly reduced the proportion of  
249 EP<sup>+</sup>;HuC/D<sup>+</sup> cells obtained at 24 hpe and consequently increased the final numbers of  
250 EP<sup>+</sup> cells observed at 48 hpe (Figure 4K-O). These results suggested that E47  
251 differentially regulates the ability of ASCL1/ATOH1 and NEUROG1/NEUROG2 to  
252 promote cell cycle exit.

253 To assess cell cycle exit, a fluorescent cytoplasmic-retention dye that is only diluted  
254 on cell division was added at the time of electroporation and its mean fluorescence  
255 intensity was measured in FACS-sorted electroporated (GFP<sup>+</sup>) cells 48 hours later  
256 (Figure 4P). This assay demonstrated that E47 itself increased the mean Violet intensity,  
257 and further enhanced the mild increase caused by ASCL1 (Figure 4Q), indicating that  
258 E47 facilitates ASCL1's ability to promote cell cycle exit. E47 had an opposite effect  
259 when combined with NEUROG1, significantly reducing the strong increase in Violet  
260 intensity caused by NEUROG1 (Figure 4Q), thereby confirming that E47 restricts  
261 NEUROG1's ability to promote cell cycle exit.

262 We next studied how E47 influences the respective abilities of ASCL1 and  
263 NEUROG1 to regulate the balance between the 3 different modes of division that spinal  
264 progenitors can undergo during neurogenesis: symmetric proliferative divisions (PP),  
265 asymmetric divisions (PN), and symmetric neurogenic divisions (NN) (Le Dreau et al,  
266 2014; Saade et al, 2013). To this end, we took advantage of the pSox2:eGFP and  
267 pTis21:RFP reporters that are specifically active during progenitor-generating (PP+PN)  
268 and neuron-generating (PN+NN) divisions, respectively (Saade et al, 2013). The effects  
269 of E47, ASCL1 and NEUROG1 on their activities were assayed 16 hpe by

270 immunohistochemistry or quantified by FACS (Figure 4R). E47 caused a significant  
271 decrease in the proportion of pSox2:eGFP<sup>+</sup>;pTis21:RFP<sup>-</sup> (PP) cells and a reciprocal  
272 increase in the proportion of pTis21:RFP<sup>+</sup> (PN+NN) neurogenic divisions relative to the  
273 controls (Figure 4S,S',V). While we did not detect any significant change in the  
274 proportions of PP, PN and NN cells in response to ASCL1 alone in these conditions, we  
275 did observe an increase in neurogenic divisions at the expense of proliferative divisions  
276 when ASCL1 was combined with E47 (Figure 4T,T',V). Conversely, E47 significantly  
277 restrained NEUROG1's ability to trigger neurogenic divisions at the expense of PP  
278 divisions (Figure 4U,V). Assessing the activity of the pSox2:luc reporter confirmed  
279 these results, further showing that E47 facilitates the ability of both ASCL1 and  
280 ATOH1 to repress pSox2 activity, whereas it restricts the repressive effects of both  
281 NEUROG1 and NEUROG2 (Figure 4-figure supplement 1D). Together, these results  
282 revealed that E47 co-operates distinctly with ASCL1/ATOH1 and  
283 NEUROG1/NEUROG2 to fine-tune neurogenic divisions during spinal neurogenesis.

284

285 **E47 co-operates distinctly with ASCL1 and NEUROG1 in an E-box dependent**  
286 **manner and through physical interactions**

287 To identify the molecular mechanisms underlying the differential co-operation of E  
288 proteins with the distinct proneural proteins, we focused on the interaction of E47 with  
289 ASCL1 and NEUROG1. A DNA-binding deficient version of NEUROG1 (NEUROG1-  
290 AQ, (Sun et al, 2001), was unable to transactivate the NEUROG-responsive  
291 pNeuroD:luc reporter or to promote neuronal differentiation (Figure 5-figure  
292 supplement 1). Hence, the ability of NEUROG1 to trigger neuronal differentiation  
293 during spinal neurogenesis depends on its transcriptional activity, as previously reported  
294 for ASCL1 and ATOH1 (Nakada et al, 2004).

295 Genome-wide ChIP-seq studies have established that the preferential E-box motifs  
296 bound by ASCL1, E47 and NEUROG1 correspond respectively to CAGCTG  
297 (Borromeo et al, 2014; Castro et al, 2011), CAGSTG (where S stands for C or G: Lin et  
298 al, 2010; Pfurr et al, 2017) and CADATG (where D stands for A, G or T: Madelaine &  
299 Blader, 2011; Seo et al, 2007). In the light of these intrinsic preferences, we tested how  
300 E47 modulates the abilities of ASCL1 and NEUROG1 to bind to DNA and activate  
301 transcription via different E-boxes (Figure 5A and Figure 5-figure supplement 2A). E47  
302 acted in synergy with both ASCL1 and NEUROG1 to drive transcription of the  
303 pkE7:luc reporter under the control of 7 CAGGTG repeats (Figure 5B,C). By contrast,  
304 E47 and ASCL1 only weakly transactivated the pNeuroD:luc reporter, the promoter of  
305 which contains 9 CADATG E-boxes and 1 CAGGTG box (Figure 5D). A similar result  
306 was obtained with a version of the pNeuroD:luc reporter in which the single CAGGTG  
307 motif was destroyed by mutagenesis (Figure 5-figure supplement 2B), reinforcing the  
308 idea that both E47 and ASCL1 preferentially bind to CAGSTG sequences. Intriguingly,  
309 E47 markedly reduced the ability of NEUROG1 to enhance pNeuroD:luc activity  
310 (Figure 5E). A similar result was obtained with the mutated version of the pNeuroD:luc  
311 reporter (Figure 5-figure supplement 2C), ruling out the possibility that specific E47  
312 binding to the single CAGGTG motif in this promoter caused this inhibition. *In vitro*  
313 ChIP assays demonstrated that E47 can bind to and enhance ASCL1 binding at the 7  
314 CAGGTG-containing promoter region of the pkE7:luc reporter (Figure 5F), consistent  
315 with the notion that their heterodimerization is required for optimal binding and  
316 subsequent transcriptional activation. By contrast, E47 caused a significant reduction in  
317 the amount of NEUROG1 bound to the promoter region of the pNeuroD:luc reporter  
318 (Figure 5G). The fact that E47 itself bound to this promoter region suggested that E47  
319 and NEUROG1 compete for binding to CADATG motifs (Figure 5G), although E47

320 cannot transactivate them as potently as NEUROG1 (Figure 5E). Together, these results  
321 revealed that E47 acts in synergy with both ASCL1 and NEUROG1 when binding to its  
322 own optimal E-box (CAGSTG), while it somehow impedes NEUROG1 from binding to  
323 CADATG motifs.

324 To confirm that the differential co-operation of E47 with ASCL1 and NEUROG1 is  
325 due to a direct physical interaction, we compared the activity of tethered constructs that  
326 were designed to produce homodimers of ASCL1 (A-A) and NEUROG1 (N-N), or  
327 heterodimers with E47 (A-E, N-E: Figure 5-figure supplement 3A-C). Consistent with  
328 the results obtained with monomers, A-E heterodimers were significantly more potent  
329 than A-A homodimers in driving pkE7:luc activity (Figure 5-figure supplement 3D),  
330 while N-N homodimers transactivated pNeuroD:luc much more strongly than N-E  
331 heterodimers (Figure 5-figure supplement 3E). A-A and A-E promoted similar neuronal  
332 differentiation 48 hpe (Figure 5H-J,M), but the average number of EP<sup>+</sup> cells obtained  
333 after A-E electroporation was significantly less than after A-A electroporation (Figure  
334 5N), suggesting that A-E promotes early neurogenic divisions more potently than A-A.  
335 This idea was supported by the ability of A-E to repress pSox2:luc activity at 20 hpe,  
336 unlike A-A (Figure 5-figure supplement 3F). As for NEUROG1, N-N was significantly  
337 more potent than N-E at promoting neuronal differentiation (Figure 5K-M), at reducing  
338 the average number of EP<sup>+</sup> cells generated 48 hpe (Figure 5N) and at repressing  
339 pSox2:luc activity (Figure 5-figure supplement 3F). Thus, the tethered constructs  
340 performed like the monomers (Figure 4G-V), supporting the conclusion that E47  
341 facilitates the ability of ASCL1 and restrains that of NEUROG1 to trigger neurogenic  
342 divisions during spinal neurogenesis.

343

344 **E47 co-operates differentially with ASCL1 and NEUROG1/NEUROG2 during**  
345 **corticogenesis**

346 We were interested to determine if this differential co-operation of E47 with the  
347 distinct proneural proteins could be extended to other regions of the developing CNS.  
348 We tested this hypothesis in the developing cerebral cortex, as NEUROG1/2 and  
349 ASCL1 all contribute to neurogenesis in this region in mammals (Huang et al, 2014).  
350 The development of the cerebral cortex in birds actually shows unexpected similarities  
351 to mammalian corticogenesis, including the conservation of its temporal sequence of  
352 neurogenesis (Dugas-Ford et al, 2012; Suzuki et al, 2012). As in mammals,  
353 corticogenesis in the chick embryo originates from a region of the dorsal pallium  
354 expressing PAX6 (Figure 6A,B and Suzuki et al, 2012). From E3 to E5, an early phase  
355 of corticogenesis produces the first SOX2<sup>-</sup>;HuC/D<sup>+</sup> cortical neurons, which are  
356 generated specifically from PAX6<sup>+</sup>;TBR2<sup>-</sup> radial glia-like progenitors that divide at the  
357 apical surface, as in mammals (Figure 6C-D). Cortical TBR2<sup>+</sup> progenitors that divide  
358 basally, similar to mammalian intermediate progenitor cells, appear at around E5  
359 (Figure 6D-D’). The cortical neurons produced during this early phase express TBR1  
360 (Figure 6-figure supplement 1A), as well as other markers typically expressed by  
361 mammalian deep-layer neurons (Dugas-Ford et al, 2012; Suzuki et al, 2012). At E4,  
362 *cNeurog1* and *cNeurog2* transcripts were detected in a salt-and-pepper fashion in the  
363 cortical PAX6<sup>+</sup> region (Figure 6E,F), whereas *cAscl1* expression was detected strongly  
364 in the sub-pallium and more weakly in the developing cerebral cortex (Figure 6G).  
365 These expression patterns seen in early chicken embryos are very similar to what is  
366 observed in the developing mammalian telencephalon (Huang et al, 2014).

367 To test how E47 modulates the activity of ASCL1 and NEUROG1/2 in the  
368 developing chick cerebral cortex, we electroporated the dorsal telencephalic region at  
369 E3 *in ovo* and analysed neuronal differentiation 2 days later (Figure 6H). Both

370 NEUROG1 and NEUROG2 triggered significant neuronal differentiation in the  
371 developing cerebral cortex in a cell autonomous and dose-dependent manner, whereas  
372 ASCL1 overexpression had only a minor effect *per se* (Figure 6I-L and Figure 6-figure  
373 supplement 1B). E47, which itself had no obvious effect at this concentration (Figure  
374 6I,M,Q), significantly increased neuronal differentiation when combined with ASCL1  
375 (Figure 6J,N,Q). Conversely, E47 markedly reduced the ability of NEUROG1, and to a  
376 lesser extent that of NEUROG2, to promote neuronal differentiation (Figure 6K-Q).  
377 These results suggest that E47 also co-operates differentially with ASCL1 and  
378 NEUROG1/2 in the context of cortical neurogenesis.



379

## **Discussion**

380 Class I HLH/E proteins are generally described as obligatory and permissive co-  
381 factors for proneural proteins, which must form heterodimers to become active and  
382 regulate transcription (Wang & Baker, 2015). The main findings of this study are that  
383 the co-operation between E proteins and proneural proteins might be more complex than  
384 originally thought. Indeed, our results revealed that E proteins can facilitate or restrain  
385 the transcriptional activity of proneural bHLH TFs depending on the E-boxes involved  
386 (Figure 7).

387 On the one hand, our results support a revised model whereby E proteins synergize  
388 with proneural proteins specifically at CAGSTG E-boxes, the preferential motifs of E  
389 proteins (Lin et al, 2010; Pfurr et al, 2017). Therefore, E proteins facilitate the activity  
390 of the proneural proteins that share their preferential binding to CAGSTG motifs, such  
391 as ASCL1 and ATOH1 (Borromeo et al, 2014; Castro et al, 2011; Klisch et al, 2011;  
392 Lai et al, 2011). Inhibiting the activity of endogenous E proteins by expressing the  
393 E47bm mutant strongly impaired the generation of interneurons derived from spinal  
394 progenitors that express ATOH1 or ASCL1 alone. Conversely, enhancing the  
395 expression of E47 reinforced the ability of ATOH1 and more markedly, that of ASCL1  
396 to promote neuronal differentiation. Our results suggest that this results from the  
397 capacity of E47 to increase the ability of these proneural proteins to trigger neurogenic  
398 divisions at the expense of proliferative ones (Figure 7). Such co-operation appears to  
399 be particularly crucial in the case of ASCL1, whose overexpression could barely  
400 increase neurogenic divisions *per se*. These observations support a growing body of  
401 evidence that ASCL1 possesses a mild neurogenic potential. For instance, the broad  
402 dP3-dP5 domain of spinal progenitors, in which ASCL1 is expressed alone or in  
403 combination with PTF1a, expands at the end of the first neurogenic wave before

404 producing large numbers of dILA/B neurons (Borromeo et al, 2014; Wildner et al,  
405 2006). Later on, ASCL1 is also involved in promoting oligodendrogenesis in both the  
406 developing brain and spinal cord (Huang et al, 2014). Moreover, recent studies have  
407 reported cell cycle promoting-genes among the targets bound by ASCL1 in the ventral  
408 telencephalon and that it also sustains the proliferation of adult neural stem cells (Castro  
409 et al, 2011; Urban et al, 2016), suggesting that its mild neurogenic ability might actually  
410 be required to sustain long-term production of the neural lineages. Whether the ability  
411 of ASCL1 to maintain neural progenitor pools is related to its dependence on the  
412 availability of E proteins is an intriguing hypothesis that would be worth testing.

413 On the other hand, our findings demonstrate that E proteins inhibit proneural protein  
414 binding to CADATG motifs. In consequence, E proteins restrict the activity of the  
415 proneural proteins that preferentially bind to these motifs, such as NEUROG1/2  
416 (Madelaine & Blader, 2011; Seo et al, 2007). Since E47 restrains the capacity of  
417 NEUROG1/2 to promote neuronal differentiation in the context of both spinal  
418 neurogenesis and corticogenesis, this would appear to be a general feature of their  
419 behaviour. Early E47 depletion was recently shown to increase the production of both  
420 TBR1<sup>+</sup> and SATB2<sup>+</sup> neurons at mid-corticogenesis (Pfurr et al, 2017). In fact, the loss  
421 of E47 in early cortical progenitors, for which NEUROG2 constitutes the main  
422 proneural protein, causes premature neuronal differentiation. This is consistent with our  
423 model and it contrasts with the block in neuronal differentiation that would be expected  
424 if E47 was essential for NEUROG2 activity.

425 Our results also suggest that NEUROGs do not necessarily need to form  
426 heterodimers with E proteins to trigger neuronal differentiation. Indeed, NEUROG1/2-  
427 dependent differentiation is only mildly affected by the loss of E47 activity, and forced  
428 NEUROG1 homodimers more efficiently drive CADATG dependent transcription and

429 neuronal differentiation than NEUROG1-E47 heterodimers. Similarly, NEUROG2  
430 homodimers better transactivate neuronal differentiation genes than NEUROG2-E47  
431 heterodimers (Li et al, 2012), and EMSA experiments suggest that multiple  
432 combinations of proneural homo- and heterodimers exist (Henke et al, 2009). The  
433 physiological relevance of such proneural homodimers is worthy of further study but to  
434 date, our attempts to determine whether NEUROG1 homodimers are formed *in vivo*  
435 during spinal neurogenesis remain inconclusive for technical reasons (data not shown).  
436 Nevertheless, the strong capacity of NEUROGs to trigger neurogenic divisions  
437 independent of E proteins, including self-consuming NN divisions, correlates well with  
438 the fact that neural progenitors expressing NEUROG1/NEUROG2 are usually depleted  
439 during the neurogenic phase (Kim et al, 2011; Simmons et al, 2001). Together, these  
440 results support the notion that E proteins are required to dampen the capacity of  
441 NEUROGs to trigger neurogenic divisions, thereby avoiding the premature depletion of  
442 neural progenitor pools (Figure 7).

443 This dual mode of action of E proteins in conjunction with ASCL1/ATOH1 or  
444 NEUROG1/NEUROG2 would also explain why modulating canonical BMP activity  
445 affects differently the generation of the distinct neuronal subtypes produced during  
446 primary spinal neurogenesis. Inhibiting BMP7 or SMAD1/5 would result in the release  
447 of E proteins from their complexes with IDs. In turn, this would facilitate ATOH1 and  
448 ASCL1 activity, prematurely increasing the proportion of neurogenic divisions  
449 undertaken by the corresponding dP1 and dP3/dP5/p2 progenitors, causing their  
450 premature differentiation and exhaustion, and ultimately leading to a production of  
451 fewer neurons. As NEUROGs are less dependent on E proteins, the inhibition of  
452 canonical BMP signalling only mildly impairs the generation of the neuronal subtypes  
453 that derive from progenitors expressing NEUROG1/NEUROG2.

454 In summary, the results presented here led us to propose that E proteins fine-tune  
455 neurogenesis by buffering the activity of the distinct proneural proteins. As such, these  
456 data add another layer of sophistication to the molecular mechanisms that regulate the  
457 activity of proneural bHLH proteins and hence, neurogenesis.  
458

459

## **Materials and Methods**

### ***In ovo electroporation***

461 Fertilized white Leghorn chicken eggs were provided by Granja Gibert, rambla  
462 Regueral, S/N, 43850 Cambrils, Spain. Eggs were incubated in a humidified atmosphere  
463 at 38°C in a Javier Masalles 240N incubator for the appropriate duration and staged  
464 according to the method of Hamburger and Hamilton (HH, (Hamburger & Hamilton,  
465 1951). According to EU animal care guidelines, no IACUC approval was necessary to  
466 perform the experiments described herein, considering that the embryos used in this  
467 study were always harvested at early stages of embryonic development (at E5 at the  
468 latest). Sex was not identified at these stages.

469 Unilateral *in ovo* electroporations in the developing chick spinal cord and dorsal  
470 telencephalon were performed respectively at stages HH14-15 and HH18 (54 and 69  
471 hours of incubation). In the telencephalon, corticogenesis was studied specifically in the  
472 dorsal-medial-lateral (dML) subregion to minimize any possible variability along the  
473 medial-lateral axis. Plasmids were diluted in RNase-free water at the required  
474 concentration [0 to 4 µg/µl] and injected into the lumen of the caudal neural tube or the  
475 right cerebral ventricle using a fine glass needle. Electroporation was triggered by  
476 applying 5 pulses of 50 ms at 22.5 V with 50 ms intervals using an Intracel Dual Pulse  
477 (TSS10) electroporator. Electroporated chicken embryos were incubated back at 37C  
478 and recovered at the times indicated (16-48 hours post-electroporation).

479

### ***Plasmids***

481 To facilitate comparisons in gain-of-function experiments, all the constructs used in  
482 this study were inserted under the control of a pCAGGS promoter that harbors high  
483 activity in chick (pCAGGS or pCAGGS\_ires\_GFP, kindly provided by Andy

484 McMahon, Megason & McMahon, 2002), and were electroporated at similar  
485 concentrations (0, 0.1, 0.5 or 1  $\mu\text{g}/\mu\text{l}$  as specified in the respective figure legends). Non-  
486 fluorescent pCAGGS plasmids were combined with 0.25  $\mu\text{g}/\mu\text{l}$  of pCS2\_H2B-GFP for  
487 visualization. The pCAGGS:ASCL1, pCAGGS:NGN1 and pCAGGS:NGN2 plasmids  
488 were kindly provided by François Guillemot. The pCAGGS:ATOH1\_ires\_GFP plasmid  
489 was obtained by subcloning from a pCMV:ATOH1 kindly provided by Nissim Ben-  
490 Arie (Krizhanovsky et al, 2006). The pCAGGS:E47 and pCAGGS:TCF12 were kindly  
491 provided by Jonas Muhr (Holmberg et al, 2008). The pCAGGS:E47bm\_ires\_GFP  
492 plasmid was derived from a pGK:E47\_CFP plasmid kindly provided by Yuan Zhang  
493 (Zhuang et al, 1998). The pCAGGS:ID2\_ires\_GFP was derived from a pCMV:ID2  
494 plasmid, and the pCAGGS\_SMAD5-SD\_ires\_GFP was described previously (Le Dreau  
495 et al, 2012). Only Somitabun (pCS2:Somitabun, kindly provided by Jonathan Slack,  
496 Beck et al, 2001) and NGN1-AQ and its wild-type NGN1 version (pMiW:myc-NGN1  
497 and pMiW:myc-NGN1-AQ, kindly gifted by Jane Johnson, Gowan et al, 2001) were  
498 used in a different backbone. HA-tagged versions of ASCL1 (pCAGGS:HA-ASCL1,  
499 Alvarez-Rodriguez & Pons, 2009) and NGN1 (pCAGGS:HA-NGN1) and a  
500 pCMV2\_Flag-E47-RFP plasmid kindly provided by Yoshihiro Yoneda (Mehmood et al,  
501 2009) were used for chromatin immunoprecipitation assays. Inhibition of cBmp7,  
502 cSmad1, cSmad5 or cId2 expression was triggered by electroporation of short-hairpin  
503 constructs inserted into the pSuper (Oligoengine) or pSHIN (Kojima et al, 2004)  
504 vectors. Electroporation of 2-4  $\mu\text{g}/\mu\text{l}$  of these constructs caused a specific and  
505 reproducible 50% inhibition of the target expression (see Le Dreau et al, 2012). The  
506 pSox2:GFP and pTis21:RFP reporters used to assess the modes of divisions undergone  
507 by spinal progenitors were previously described in details (Saade et al, 2013). The  
508 pSox2:luc derived from the pSox2:GFP (Saade et al, 2013). The different versions of

509 the pId2:luc reporters were kindly provided by Yoshifumi Yokota (Kurooka et al,  
510 2012). The pkE7:luc (Akazawa et al, 1995) and pNeuroD:luc reporters were kindly  
511 provided by Masashi Kawaichi and François Guillemot, respectively. The  
512 pNeuroDmut:luc reporter was obtained by site-directed mutagenesis of the single  
513 CAGGTG E-box contained in the NeuroD promoter region. The pTubb3:luc reporter  
514 was obtained by subcloning the Tubb3 enhancer region present in the pTubb3enh:GFP  
515 plasmid kindly provided by Jonas Muhr (Bergsland et al, 2011) into the pGL3:luc  
516 vector (Promega).

517

### 518 *Generation of tethered constructs*

519 The tethered bHLH dimers were derived from the pCAGGS:ASCL1-t-E47\_ires\_GFP  
520 kindly provided by François Guillemot (Geoffroy et al, 2009). This plasmid and  
521 pCAGGS:NGN1 were used as templates to generate the pCAGGS:ASCL1-t-  
522 ASCL1\_ires\_GFP, pCAGGS:NGN1-t-E47\_ires\_GFP and pCAGGS:NGN1-t-  
523 NGN1\_ires\_GFP plasmids, using a tether peptide AAAGTSAGGAAAGTSASAATGA  
524 flanked by SpeI and ClaI restriction sites as described previously (Henke et al, 2009).  
525 Expression of the tethered bHLH dimers was assessed by western blot after transfection  
526 into HEK293 cells. Transient cell transfections were obtained by electroporation  
527 applying 2 pulses of 120V, 30ms (Microporator MP-100, Digital Bio). Cells were  
528 grown for 24 hours onto poly-L-Lysine-coated 6-well dishes in DMEM/F12  
529 supplemented with 10% fetal bovine serum and 50 mg/L of Gentamicin until reaching  
530 70-80% confluence. The typical transfection efficiency of this procedure was 40-60%.  
531 Cells were lysed in 1X SDS loading buffer (10% glycerol, 2% SDS, 100 mM  
532 dithiothreitol, and 62.5 mM Tris-HCl, pH 6.8) and DNA was disrupted by sonication.  
533 Protein extracts were separated by SDS-PAGE electrophoresis, transferred to

534 Immobilon-FL PVDF membranes (IPFL00010, Millipore), blocked with the  
535 Odyssey Blocking Buffer (927-40000, LI-COR), and incubated with antibodies against  
536 ASCL1 (BD Pharmingen, cat#556604, 1:1000), NGN1 (Millipore, cat#AB15616,  
537 1:3000) or E2A (Santa Cruz, cat#sc-763, 1:1000). Detection was performed using  
538 fluorescence-conjugated secondary antibodies and an Odyssey Imaging System (LI-  
539 COR).

540

#### 541 ***Immunohistochemistry***

542 For immunohistochemistry experiments, chicken embryos were carefully dissected,  
543 fixed for 2 hours at 4°C in 4% paraformaldehyde and rinsed in PBS. Immunostaining  
544 was performed on either vibratome (40 µm) or cryostat (16 µm) sections following  
545 standard procedures. After washing in PBS-0.1% Triton, the sections were incubated  
546 overnight at 4C with the appropriate primary antibodies ([Supplementary File 1](#)) diluted  
547 in a solution of PBS-0.1% Triton supplemented with 10% bovine serum albumin or  
548 sheep serum. After washing in PBS-0.1% Triton, sections were incubated for 2 hours at  
549 room temperature with the appropriate secondary antibodies diluted in a solution of  
550 PBS-0.1% Triton supplemented with 10% bovine serum albumin or sheep serum.  
551 Alexa488-, Alexa555- and Cy5-conjugated secondary antibodies were obtained from  
552 Invitrogen and Jackson Laboratories. Sections were finally stained with 1 µg/ml DAPI  
553 and mounted in Mowiol (Sigma-Aldrich).

554

#### 555 ***Image acquisition, treatment and quantification.***

556 Optical sections of fixed samples (transverse views of the spinal cord, coronal views  
557 for the telencephalon) were acquired at room temperature with the Leica LAS software,  
558 in a Leica SP5 confocal microscope using 10x (dry HC PL APO, NA 0.40), 20x (dry



559 HC PL APO, NA 0.70), 40x (oil HCX PL APO, NA 1.25-0.75) or 63x (oil HCX PL  
560 APO, NA 1.40-0.60) objective lenses. Maximal projections obtained from 2 $\mu$ m Z-stack  
561 images were processed in Photoshop CS5 (Adobe) or ImageJ for image merging,  
562 resizing and cell counting.

563 Quantification of endogenous ID2 intensity was assessed using the ImageJ software.  
564 Cell nuclei of H2B-GFP+ electroporated and neighboring non-electroporated cells were  
565 delimited by polygonal selection, and the mean intensity of ID2 immunoreactivity  
566 quantified as mean gray values. Quantifications were performed on at least six  
567 electroporated and six non-electroporated cells per image, in at least three different  
568 images per embryo.

569

#### 570 *In situ hybridization*

571 Chicken embryos were recovered at the indicated stage, fixed overnight at 4°C in 4%  
572 PFA, rinsed in PBS and processed for whole mount RNA in situ hybridization  
573 following standard procedures. Probes against chick cId2 (#chEST852M19) and cNgn2  
574 (#chEST387d10) were purchased from the chicken EST project (UK-HGMP RC).  
575 Probes against cTcf3/E2a, cAscl1 and cNgn1 were kindly provided by Drs Jonas Muhr,  
576 José-Maria Frade and Cristina Pujades. The probe against cTcf12/cHeb was obtained by  
577 PCR from genomic DNA of E4 chicken embryonic tissue and the purified 623  
578 nucleotides insert was sub-cloned into the pGEM-T vector (Promega). Hybridized  
579 embryos were post-fixed in 4% PFA and washed in PBT. 45 $\mu$ m-thick sections were cut  
580 with a vibratome (VT1000S, Leica), mounted and photographed using a microscope  
581 (DC300, Leica). The data show representative images obtained from 3 embryos for each  
582 probe.

583

584 ***Luciferase assay***

585 Transcriptional activity was assessed following electroporation of the reporters  
586 p $\kappa$ E7:luc (gift from Masashi Kawaichi), pNeuroD:luc (gift from François Guillemot),  
587 pNeuroDmut:luc, pSox2:luc or the different versions of pId2:luc (provided by  
588 Yoshifumi Yokota) together with a renilla luciferase reporter used for normalization and  
589 the indicated bHLH TF-encoding plasmids. Embryos were harvested 24 hours later and  
590 GFP-positive neural tubes were dissected and homogenized in a Passive Lysis Buffer on  
591 ice. Firefly- and renilla-luciferase activities were measured by the Dual Luciferase  
592 Reporter Assay System (Promega).

593

594 ***Cell cycle exit assay***

595 The average number of divisions undergone by electroporated spinal progenitors was  
596 assessed *in vivo* using the CellTrace Violet Cell Proliferation Kit (Invitrogen). The  
597 Violet cell tracer (1 mM), a cytoplasmic retention dye that becomes diluted as cells  
598 divide, was injected into the lumen of the neural tube at the time of electroporation.  
599 Embryos were recovered 48 hours later, the neural tubes were carefully dissected and  
600 recovered and the cells dissociated following a 10-15 min digestion in Trypsin-EDTA  
601 (Sigma). The fluorescence intensity of the Violet tracer was measured in viable  
602 dissociated electroporated GFP<sup>+</sup> cells in the 405/450nm excitation/emission range on a  
603 Gallios flow cytometer (Beckman Coulter, Inc).

604

605 ***Assessment of the modes of divisions***

606 Chicken embryos were recovered 16 hours after co-electroporation of the  
607 pSox2:eGFP and pTis21:RFP reporters together with the indicated bHLH TF-encoding  
608 plasmids. Cell suspensions were obtained from pools of 6-8 dissected neural tubes after

609 digestion with Trypsin-EDTA (Sigma) for 10-15 min, and further processed on a FACS  
610 Aria III cell sorter (BD Biosciences) for measurement of eGFP and RFP fluorescences.  
611 At least 1,000 cells for each progenitor population (PP, PN and NN) were analyzed per  
612 sample.

613

#### 614 ***Chromatin immunoprecipitation assay***

615 HEK293 cells were transfected by a standard calcium phosphate co-precipitation  
616 protocol with combinations of pCAGGS\_ires\_GFP, pCAGGS:HA-ASCL1,  
617 pCAGGS:HA-NGN1, pCMV2\_Flag-E47-RFP together with the pE7:luc or  
618 pNeuroD:luc reporters, with a total of 10 µg of DNA per 100 mm dish. 24 hours later,  
619 cells were collected and 10% of the material was reserved to check transfection by  
620 Western blot. For chromatin immunoprecipitation assays, approximately 1 million  
621 transfected HEK293 cells were fixed with 1% formaldehyde for 10 minutes at room  
622 temperature. Fixation was quenched by adding 0.125M glycine for 5 minutes. After 2  
623 washes with PBS, cells were lysed on ice for 20 minutes in a lysis buffer containing  
624 protease inhibitors (1% SDS; 10mM EDTA pH8.0; 50mM Tris-HCl pH8.1). Sonication  
625 was performed with a Bioruptor sonicator to obtain 200-500bp shredded chromatin  
626 fragments. Chromatin purification was carried out by spinning samples down at  
627 maximum speed at 4°C during 30 minutes. Purified chromatin was pre-cleared with  
628 protein A agarose (Millipore #16-125) for 30 minutes. 25 µg of chromatin were  
629 immunoprecipitated with 5µL of anti-RFP serum (Herrera et al, 2014), 2µg of anti-HA  
630 (Abcam, cat#20084), anti-NGN1 (Millipore, cat#15616) or unspecific rabbit IgG  
631 (Diagenode, cat#C15410206) antibodies. Antibody-chromatin complexes were  
632 recovered using magnetic beads (Magna ChIP, Millipore, cat#16-661) and immuno-  
633 complexes were washed once with TSE I (0.1% SDS; 1% Triton-X100; 2mM EDTA

634 pH8.0; 20mM Tris-HCl pH8.1; 150mM NaCl), TSE II (0.1% SDS; 1% Triton-X100;  
635 2mM EDTA pH8.0; 20mM Tris-HCl pH8.1; 500mM NaCl), TSE III (0.25M LiCl; 1%  
636 NP-40; 1% Sodium Deoxycholate; 1mM EDTA pH8.0; 10mM Tris-HCl pH8.1) and  
637 twice with TE (Tris-HCl 10mM, EDTA 1mM). Reversal of crosslinking was done by  
638 incubating samples in elution buffer (1% SDS, 0.1M NaHCO<sub>3</sub>) overnight at 65C. DNA  
639 was purified by phenol-chloroform extraction followed by ethanol precipitation.  
640 Quantification of the DNA target regions and negative control (luciferase ORF) was  
641 assessed by qPCR in a Lightcycler 480 (Roche) using specific primers ([Supplementary](#)  
642 [File 2](#)).

643 Proteins extracts were obtained by incubation in a RIPA buffer (150 mM NaCl, 1.0%  
644 NP-40, 0.5% sodium deoxycholate, 0.1% SDS and 50 mM Tris, pH 8.0) supplemented  
645 with protease and phosphatase inhibitors for 20 minutes on ice and centrifugation (20  
646 minutes at maximum speed). 30 µg of protein samples were mixed with the Laemmli  
647 buffer (375 mM Tris pH =6.8, 12%SDS, 60% glycerol, 600 mM DTT, 0.06%  
648 bromphenol blue), heated to 95C and then separated on a SDS-PAGE gel in running  
649 buffer (25 mM Tris base, 190 mM glycine, 0.1% SDS, pH=8,3). Proteins were  
650 transferred to a nitrocellulose membrane using transfer buffer (190 mM glycine, 25mM  
651 Tris, 20% Methanol, 0.1% SDS) for 90 minutes at 80V. Membranes were blocked for 1  
652 h with a solution of PBS-5% milk, 1% Tween (PBST) and further incubated overnight  
653 at 4C with appropriate primary antibodies diluted in PBST: rabbit anti-HA (Abcam, cat  
654 #ab20084), rabbit anti-RFP serum (Herrera et al, 2014) and mouse anti-Tubulin beta  
655 (Millipore, cat #MAB3408). After three washes in PBST, membranes were incubated  
656 with Horseradish peroxidase-conjugated anti-rabbit IgG or anti-mouse IgG secondary  
657 antibodies (Sigma-Aldrich, cat#GENA934-1ML and cat#GENA931) for 1 hour at

658 room temperature and the signals detected by chemiluminescence using the Immobilon  
659 western chemiluminiscent HRP substrate (Sigma-Aldrich, cat# WBKLS0100).

660

### 661 ***Statistical analyses***

662 No statistical method was used to predetermine sample size. The experiments were  
663 not randomized. The investigators were not blinded to allocation during experiments  
664 or outcome assessment. Statistical analyses were performed using the GraphPad  
665 Prism 6 software (GraphPad Software, Inc.). For *in vivo* experiments, cell counts were  
666 typically performed on 2-5 images per embryo and *n* values correspond to different  
667 embryos, except for the assessment of the modes of divisions where *n* values  
668 correspond to pools of embryos. For *in vitro* chromatin immunoprecipitation assays, *n*  
669 values represent the numbers of independent experiments performed. The *n* values  
670 are indicated in the corresponding figure legend. The normal distribution of the  
671 values was assessed by the Shapiro-Wilk normality test. Significance was then  
672 assessed with a two-sided unpaired t-test, one-way ANOVA + Tukey's test or two-  
673 way ANOVA + Sidak's test for data presenting a normal distribution, or alternatively  
674 with non-parametric Mann-Whitney or Kruskal-Wallis + Dunn's multiple  
675 comparisons' tests for non-normally distributed data. n.s: non-significant; \*:  $p < 0.05$   
676 or less, as indicated in individual figures.

677

678

679

680

## **Acknowledgments**

681 We thank the members of the laboratory for helpful comments on the manuscript.

682 We are grateful to Drs N. Ben-Arie, C. Birchmeier, J-M. Frade, F. Giraldez, F.

683 Guillemot, T.M. Jessell, J.E. Johnson, A. Joyner, M. Kawaichi, A McMahon, J. Muhr,

684 T. Müller, S. Pfaff, C. Pujades, J. Slack, Y. Yokota, Y. Yoneda and Y. Zhuang for

685 kindly providing reagents. We also thank the Developmental Studies Hybridoma Bank,

686 developed under the auspices of the NICHD and maintained by The University of Iowa,

687 Department of Biological Sciences, Iowa City, IA, USA. We acknowledge E. Rebollo

688 and the IBMB Molecular Imaging platform and J. Comas and the PCB Flow Cytometry

689 facility for excellent assistance. This work was supported by the grants to E.M from

690 BFU2016-81887-REDT and BFU2016-77498-P. G. LD was supported by AECC

691 (AIO2014). R.E and A. H were recipient of postdoctoral fellowships from the Mexican

692 National Council of Science and Technology (CONACYT) and Spanish Ministry of

693 Education, Industry and Competitiveness (MINECO, Program Juan de la Cierva, #FJCI-

694 2015-26175). R.F was recipient of a Ph.D fellowship from the Spanish Ministry of

695 Education, Culture and Sports (MECD, program FPU, #FPU13/01384).

696

697

698

699

## References

- 700 Akazawa C, Ishibashi M, Shimizu C, Nakanishi S, Kageyama R (1995) A mammalian  
701 helix-loop-helix factor structurally related to the product of Drosophila proneural gene  
702 atonal is a positive transcriptional regulator expressed in the developing nervous  
703 system. *J Biol Chem* **270**(15): 8730-8738  
704
- 705 Ali F, Hindley C, McDowell G, Deibler R, Jones A, Kirschner M, Guillemot F, Philpott  
706 A (2011) Cell cycle-regulated multi-site phosphorylation of Neurogenin 2 coordinates  
707 cell cycling with differentiation during neurogenesis. *Development* **138**(19): 4267-4277  
708
- 709 Ali FR, Cheng K, Kirwan P, Metcalfe S, Livesey FJ, Barker RA, Philpott A (2014) The  
710 phosphorylation status of Ascl1 is a key determinant of neuronal differentiation and  
711 maturation in vivo and in vitro. *Development* **141**(11): 2216-2224  
712
- 713 Alvarez-Rodriguez R, Pons S (2009) Expression of the proneural gene encoding Mash1  
714 suppresses MYCN mitotic activity. *J Cell Sci* **122**(Pt 5): 595-599  
715
- 716 Beck CW, Whitman M, Slack JM (2001) The role of BMP signaling in outgrowth and  
717 patterning of the Xenopus tail bud. *Dev Biol* **238**(2): 303-314  
718
- 719 Bergsland M, Ramskold D, Zaouter C, Klum S, Sandberg R, Muhr J (2011)  
720 Sequentially acting Sox transcription factors in neural lineage development. *Genes Dev*  
721 **25**(23): 2453-2464  
722
- 723 Bertrand N, Castro DS, Guillemot F (2002) Proneural genes and the specification of  
724 neural cell types. *Nat Rev Neurosci* **3**(7): 517-530  
725
- 726 Borromeo MD, Meredith DM, Castro DS, Chang JC, Tung KC, Guillemot F, Johnson  
727 JE (2014) A transcription factor network specifying inhibitory versus excitatory neurons  
728 in the dorsal spinal cord. *Development* **141**(14): 2803-2812  
729
- 730 Castro DS, Martynoga B, Parras C, Ramesh V, Pacary E, Johnston C, Drechsel D,  
731 Lebel-Potter M, Garcia LG, Hunt C, Dolle D, Bithell A, Ettwiller L, Buckley N,  
732 Guillemot F (2011) A novel function of the proneural factor Ascl1 in progenitor  
733 proliferation identified by genome-wide characterization of its targets. *Genes Dev*  
734 **25**(9): 930-945  
735
- 736 Choe Y, Kozlova A, Graf D, Pleasure SJ (2013) Bone morphogenic protein signaling is  
737 a major determinant of dentate development. *J Neurosci* **33**(16): 6766-6775  
738
- 739 Dugas-Ford J, Rowell JJ, Ragsdale CW (2012) Cell-type homologies and the origins of  
740 the neocortex. *Proc Natl Acad Sci U S A* **109**(42): 16974-16979  
741
- 742 Genander M, Cook PJ, Ramskold D, Keyes BE, Mertz AF, Sandberg R, Fuchs E (2014)  
743 BMP signaling and its pSMAD1/5 target genes differentially regulate hair follicle stem  
744 cell lineages. *Cell Stem Cell* **15**(5): 619-633  
745
- 746 Geoffroy CG, Critchley JA, Castro DS, Ramelli S, Barraclough C, Descombes P,  
747 Guillemot F, Raineteau O (2009) Engineering of dominant active basic helix-loop-helix



- 748 proteins that are resistant to negative regulation by postnatal central nervous system  
749 antineurogenic cues. *Stem Cells* **27**(4): 847-856  
750
- 751 Glasgow SM, Henke RM, Macdonald RJ, Wright CV, Johnson JE (2005) Ptf1a  
752 determines GABAergic over glutamatergic neuronal cell fate in the spinal cord dorsal  
753 horn. *Development* **132**(24): 5461-5469  
754
- 755 Gowan K, Helms AW, Hunsaker TL, Collisson T, Ebert PJ, Odom R, Johnson JE  
756 (2001) Crossinhibitory activities of Ngn1 and Math1 allow specification of distinct  
757 dorsal interneurons. *Neuron* **31**(2): 219-232  
758
- 759 Guillemot F (2007) Spatial and temporal specification of neural fates by transcription  
760 factor codes. *Development* **134**(21): 3771-3780  
761
- 762 Hamburger V, Hamilton HL (1951) A series of normal stages in the development of  
763 chick embryo. *J Morphol* **88**: 49-92  
764
- 765 Henke RM, Meredith DM, Borromeo MD, Savage TK, Johnson JE (2009) Ascl1 and  
766 Neurog2 form novel complexes and regulate Delta-like3 (Dll3) expression in the neural  
767 tube. *Dev Biol* **328**(2): 529-540  
768
- 769 Herrera A, Saade M, Menendez A, Marti E, Pons S (2014) Sustained Wnt/beta-catenin  
770 signalling causes neuroepithelial aberrations through the accumulation of aPKC at the  
771 apical pole. *Nat Commun* **5**: 4168  
772
- 773 Holmberg J, Hansson E, Malewicz M, Sandberg M, Perlmann T, Lendahl U, Muhr J  
774 (2008) SoxB1 transcription factors and Notch signaling use distinct mechanisms to  
775 regulate proneural gene function and neural progenitor differentiation. *Development*  
776 **135**(10): 1843-1851  
777
- 778 Hollnagel A, Oehlmann V, Heymer J, Ruther U, Nordheim A (1999) Id genes are direct  
779 targets of bone morphogenetic protein induction in embryonic stem cells. *J Biol Chem*  
780 **274**(28): 19838-19845  
781
- 782 Huang C, Chan JA, Schuurmans C (2014) Proneural bHLH genes in development and  
783 disease. *Curr Top Dev Biol* **110**: 75-127  
784
- 785 Imayoshi I, Kageyama R (2014) bHLH factors in self-renewal, multipotency, and fate  
786 choice of neural progenitor cells. *Neuron* **82**(1): 9-23  
787
- 788 Kim EJ, Hori K, Wyckoff A, Dickel LK, Koundakjian EJ, Goodrich LV, Johnson JE  
789 (2011) Spatiotemporal fate map of neurogenin1 (Neurog1) lineages in the mouse central  
790 nervous system. *J Comp Neurol* **519**(7): 1355-1370  
791
- 792 Klisch TJ, Xi Y, Flora A, Wang L, Li W, Zoghbi HY (2011) In vivo Atoh1 targetome  
793 reveals how a proneural transcription factor regulates cerebellar development. *Proc Natl  
794 Acad Sci U S A* **108**(8): 3288-3293  
795
- 796 Kojima S, Vignjevic D, Borisy GG (2004) Improved silencing vector co-expressing  
797 GFP and small hairpin RNA. *Biotechniques* **36**(1): 74-79



- 798  
799 Krizhanovsky V, Soreq L, Kliminski V, Ben-Arie N (2006) Math1 target genes are  
800 enriched with evolutionarily conserved clustered E-box binding sites. *J Mol Neurosci*  
801 **28**(2): 211-229  
802
- 803 Kurooka H, Nakahiro T, Mori K, Sano K, Yokota Y (2012) BMP signaling is  
804 responsible for serum-induced Id2 expression. *Biochem Biophys Res Commun* **420**(2):  
805 281-287  
806
- 807 Lai HC, Klisch TJ, Roberts R, Zoghbi HY, Johnson JE (2011) In vivo neuronal  
808 subtype-specific targets of Atoh1 (Math1) in dorsal spinal cord. *J Neurosci* **31**(30):  
809 10859-10871  
810
- 811 Lai HC, Seal RP, Johnson JE (2016) Making sense out of spinal cord somatosensory  
812 development. *Development* **143**(19): 3434-3448  
813
- 814 Le Dreau G, Garcia-Campmany L, Rabadan MA, Ferronha T, Tozer S, Briscoe J, Marti  
815 E (2012) Canonical BMP7 activity is required for the generation of discrete neuronal  
816 populations in the dorsal spinal cord. *Development* **139**(2): 259-268  
817
- 818 Le Dreau G, Marti E (2013) The multiple activities of BMPs during spinal cord  
819 development. *Cell Mol Life Sci*  
820
- 821 Le Dreau G, Saade M, Gutierrez-Vallejo I, Marti E (2014) The strength of SMAD1/5  
822 activity determines the mode of stem cell division in the developing spinal cord. *J Cell*  
823 *Biol* **204**(4): 591-605  
824
- 825 Li S, Mattar P, Zinyk D, Singh K, Chaturvedi CP, Kovach C, Dixit R, Kurrasch DM,  
826 Ma YC, Chan JA, Wallace V, Dilworth FJ, Brand M, Schuurmans C (2012) GSK3  
827 temporally regulates neurogenin 2 proneural activity in the neocortex. *J Neurosci*  
828 **32**(23): 7791-7805  
829
- 830 Lin YC, Jhunjhunwala S, Benner C, Heinz S, Welinder E, Mansson R, Sigvardsson M,  
831 Hagman J, Espinoza CA, Dutkowski J, Ideker T, Glass CK, Murre C (2010) A global  
832 network of transcription factors, involving E2A, EBF1 and Foxo1, that orchestrates B  
833 cell fate. *Nat Immunol* **11**(7): 635-643  
834
- 835 Liu A, Niswander LA (2005) Bone morphogenetic protein signalling and vertebrate  
836 nervous system development. *Nat Rev Neurosci* **6**(12): 945-954  
837
- 838 Madelaine R, Blader P (2011) A cluster of non-redundant Ngn1 binding sites is required  
839 for regulation of deltaA expression in zebrafish. *Dev Biol* **350**(1): 198-207  
840
- 841 Massague J, Seoane J, Wotton D (2005) Smad transcription factors. *Genes Dev* **19**(23):  
842 2783-2810  
843
- 844 Massari ME, Murre C (2000) Helix-loop-helix proteins: regulators of transcription in  
845 eucaryotic organisms. *Mol Cell Biol* **20**(2): 429-440  
846

- 847 Masserdotti G, Gascon S, Gotz M (2016) Direct neuronal reprogramming: learning  
848 from and for development. *Development* **143**(14): 2494-2510  
849
- 850 Megason SG, McMahon AP (2002) A mitogen gradient of dorsal midline Wnts  
851 organizes growth in the CNS. *Development* **129**(9): 2087-2098  
852
- 853 Mehmood R, Yasuhara N, Oe S, Nagai M, Yoneda Y (2009) Synergistic nuclear import  
854 of NeuroD1 and its partner transcription factor, E47, via heterodimerization. *Exp Cell*  
855 *Res* **315**(10): 1639-1652  
856
- 857 Misra K, Luo H, Li S, Matisse M, Xiang M (2014) Asymmetric activation of Dll4-Notch  
858 signaling by Foxn4 and proneural factors activates BMP/TGFbeta signaling to specify  
859 V2b interneurons in the spinal cord. *Development* **141**(1): 187-198  
860
- 861 Moya IM, Umans L, Maas E, Pereira PN, Beets K, Francis A, Sents W, Robertson EJ,  
862 Mummery CL, Huylebroeck D, Zwijsen A (2012) Stalk cell phenotype depends on  
863 integration of Notch and Smad1/5 signaling cascades. *Dev Cell* **22**(3): 501-514  
864
- 865 Murre C, McCaw PS, Baltimore D (1989) A new DNA binding and dimerization motif  
866 in immunoglobulin enhancer binding, daughterless, MyoD, and myc proteins. *Cell*  
867 **56**(5): 777-783  
868
- 869 Nakada Y, Hunsaker TL, Henke RM, Johnson JE (2004) Distinct domains within  
870 Mash1 and Math1 are required for function in neuronal differentiation versus neuronal  
871 cell-type specification. *Development* **131**(6): 1319-1330  
872
- 873 Pfurr S, Chu YH, Bohrer C, Greulich F, Beattie R, Mammadzada K, Hils M, Arnold SJ,  
874 Taylor V, Schachtrup K, Uhlenhaut NH, Schachtrup C (2017) The E2A splice variant  
875 E47 regulates the differentiation of projection neurons via p57(KIP2) during cortical  
876 development. *Development* **144**(21): 3917-3931  
877
- 878 Quan XJ, Yuan L, Tiberi L, Claeys A, De Geest N, Yan J, van der Kant R, Xie WR,  
879 Klisch TJ, Shymkowitz J, Rousseau F, Bollen M, Beullens M, Zoghbi HY,  
880 Vanderhaeghen P, Hassan BA (2016) Post-translational Control of the Temporal  
881 Dynamics of Transcription Factor Activity Regulates Neurogenesis. *Cell* **164**(3): 460-  
882 475  
883
- 884 Saade M, Gutierrez-Vallejo I, Le Dreau G, Rabadan MA, Miguez DG, Buceta J, Marti  
885 E (2013) Sonic hedgehog signaling switches the mode of division in the developing  
886 nervous system. *Cell Rep* **4**(3): 492-503  
887
- 888 Segklia A, Seuntjens E, Elkouris M, Tsalavos S, Stappers E, Mitsiadis TA, Huylebroeck  
889 D, Remboutsika E, Graf D (2012) Bmp7 regulates the survival, proliferation, and  
890 neurogenic properties of neural progenitor cells during corticogenesis in the mouse.  
891 *PLoS One* **7**(3): e34088  
892
- 893 Seo S, Lim JW, Yellajoshiyula D, Chang LW, Kroll KL (2007) Neurogenin and NeuroD  
894 direct transcriptional targets and their regulatory enhancers. *EMBO J* **26**(24): 5093-5108  
895

- 896 Simmons AD, Horton S, Abney AL, Johnson JE (2001) Neurogenin2 expression in  
897 ventral and dorsal spinal neural tube progenitor cells is regulated by distinct enhancers.  
898 *Dev Biol* **229**(2): 327-339  
899
- 900 Sobrado VR, Moreno-Bueno G, Cubillo E, Holt LJ, Nieto MA, Portillo F, Cano A  
901 (2009) The class I bHLH factors E2-2A and E2-2B regulate EMT. *J Cell Sci* **122**(Pt 7):  
902 1014-1024  
903
- 904 Sun Y, Nadal-Vicens M, Misono S, Lin MZ, Zubiaga A, Hua X, Fan G, Greenberg ME  
905 (2001) Neurogenin promotes neurogenesis and inhibits glial differentiation by  
906 independent mechanisms. *Cell* **104**(3): 365-376  
907
- 908 Suzuki IK, Kawasaki T, Gojobori T, Hirata T (2012) The temporal sequence of the  
909 mammalian neocortical neurogenetic program drives mediolateral pattern in the chick  
910 pallium. *Dev Cell* **22**(4): 863-870  
911
- 912 Urban N, van den Berg DL, Forget A, Andersen J, Demmers JA, Hunt C, Ayrault O,  
913 Guillemot F (2016) Return to quiescence of mouse neural stem cells by degradation of a  
914 proactivation protein. *Science* **353**(6296): 292-295  
915
- 916 Wang LH, Baker NE (2015) E Proteins and ID Proteins: Helix-Loop-Helix Partners in  
917 Development and Disease. *Dev Cell* **35**(3): 269-280  
918
- 919 Wildner H, Muller T, Cho SH, Brohl D, Cepko CL, Guillemot F, Birchmeier C (2006)  
920 dILA neurons in the dorsal spinal cord are the product of terminal and non-terminal  
921 asymmetric progenitor cell divisions, and require Mash1 for their development.  
922 *Development* **133**(11): 2105-2113  
923
- 924 Zeng H, Sanes JR (2017) Neuronal cell-type classification: challenges, opportunities  
925 and the path forward. *Nat Rev Neurosci* **18**(9): 530-546  
926
- 927 Zhuang Y, Barndt RJ, Pan L, Kelley R, Dai M (1998) Functional replacement of the  
928 mouse E2A gene with a human HEB cDNA. *Mol Cell Biol* **18**(6): 3340-3349  
929  
930  
931  
932

933

## **Additional Files**

934

935 • Figure 1-figure supplement 1: Inhibiting the canonical BMP pathway affects the  
936 generation of ventral spinal neurons.

937 • Figure 2-figure supplement 1: Regulation of ID2 expression by the canonical BMP  
938 pathway.

939 • Figure 2-figure supplement 2: Modulation of ID2 activity *in vivo*.

940 • Figure 3-figure supplement 1: E47bm rescues the premature neuronal  
941 differentiation caused by both E47 and TCF12.

942 • Figure 4-figure supplement 1: Effects of E47 and proneural proteins on spinal  
943 neuronal differentiation.

944 • Figure 5-figure supplement 1: The ability of NEUROG1 to induce spinal neuronal  
945 differentiation depends on its DNA-binding.

946 • Figure 5-figure supplement 2: E-box dependent activity of E47, ASCL1 and  
947 NEUROG1 during spinal neurogenesis.

948 • Figure 5-figure supplement 3: Characterization of the tethered constructs of bHLH  
949 dimers.

950 • Figure 6-figure supplement 1: Neurogenesis and concentration dependent effects of  
951 proneural proteins during early chick corticogenesis.

952 • Supplementary File 1: List of antibodies

953 • Supplementary File 2: List of primers used for ChIP assays.

954

955

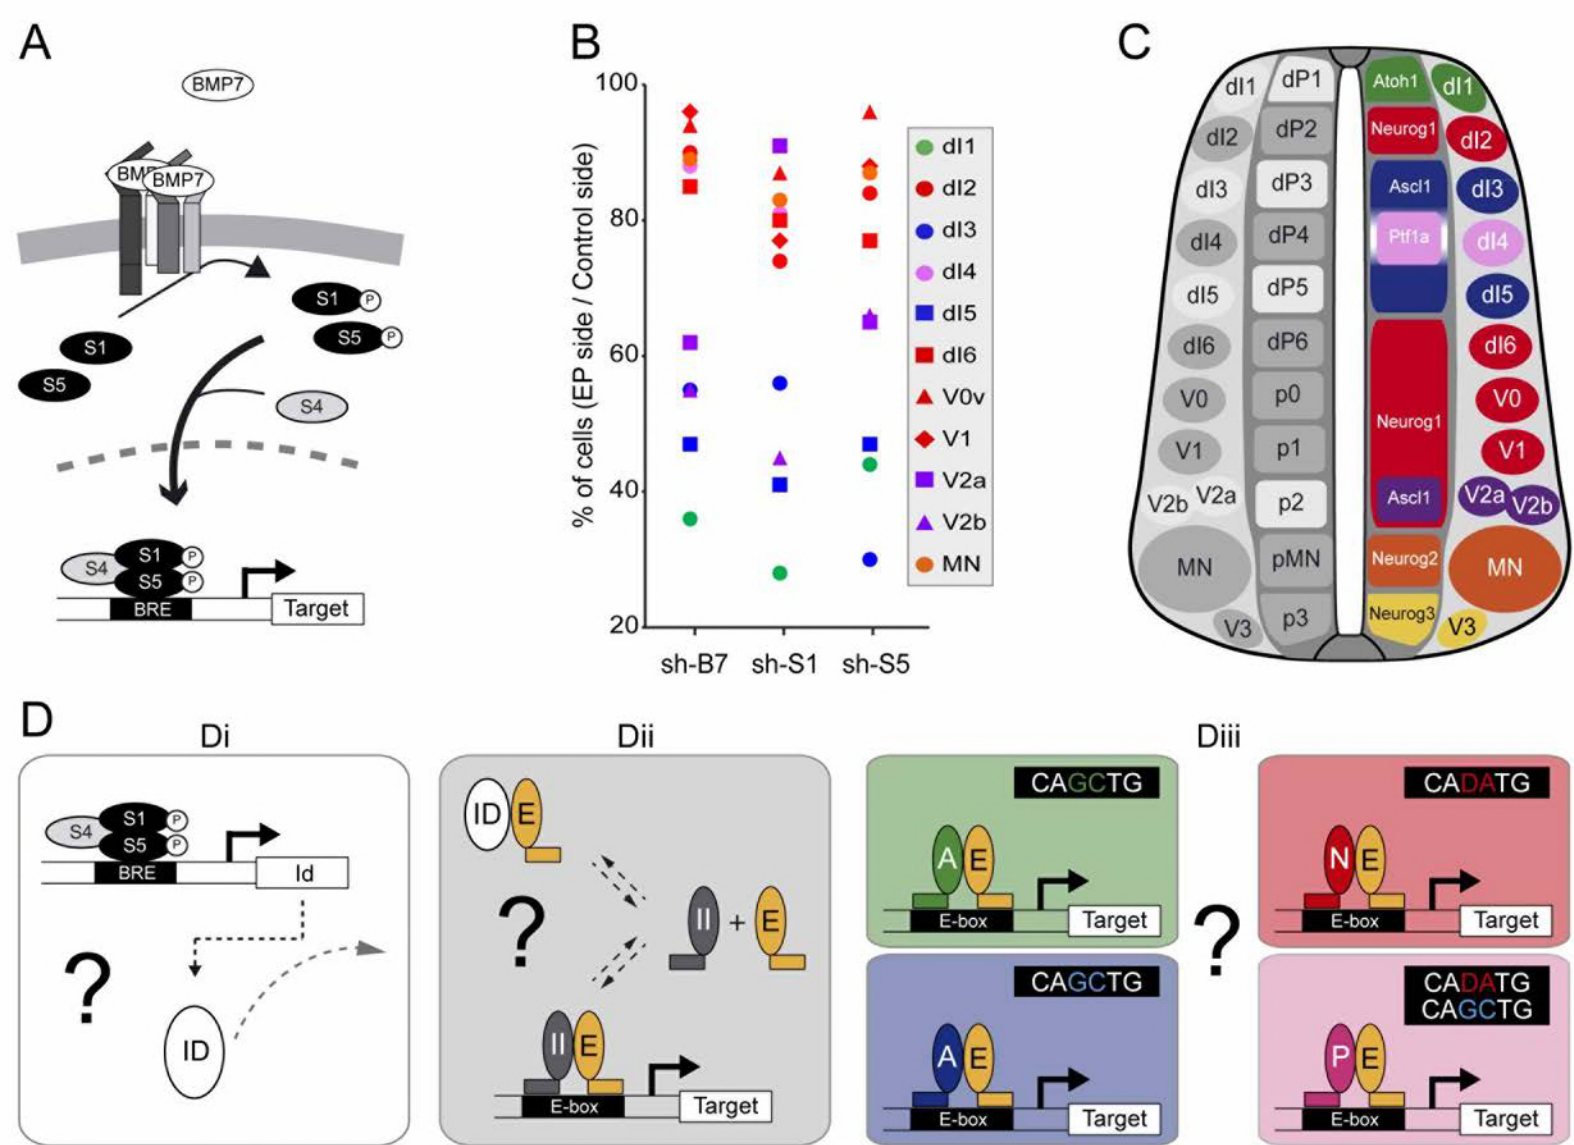

**Figure 1: The canonical BMP pathway differentially regulates the generation of spinal neurons derived from progenitors that express ASCL1/ATOH1 or NEUROG1/NEUROG2/PTF1a.**

(A) Actors of the canonical BMP pathway (BMP7, SMAD1 and SMAD5) known to regulate spinal neurogenesis. (B) Dot-plot representing the spinal neuronal subtypes generated 48 hpe with plasmids producing sh-RNA targeting *cBmp7* (sh-B7), *cSmad1* (sh-S1) or *cSmad5* (sh-S5), comparing the electroporated side to the contra-lateral side. The colour code corresponds to the proneural proteins expressed in the corresponding progenitor domains, as shown in C. (C) Drawing of a transverse section of the developing spinal cord at mid-neurogenesis, highlighting: (left) the neuronal subtypes strongly (white) or moderately (grey) affected by inhibiting canonical BMP activity, and (right) a colour-coded representation of the proneural proteins expressed in the corresponding progenitor domains. (D) Working hypothesis whereby we propose to test if i) the canonical BMP activity is mediated by ID proteins; ii) ID proteins act by sequestering E proteins (E, orange), thereby inhibiting the activity of class II HLH/proneural proteins (II, grey); and iii) E proteins co-operate equally or differentially with the distinct proneural proteins as a function of their preferential binding to specific E-box sequences. The following figure supplement is available for figure 1:  
 Figure supplement 1: Inhibiting the canonical BMP pathway affects the generation of ventral spinal neurons.



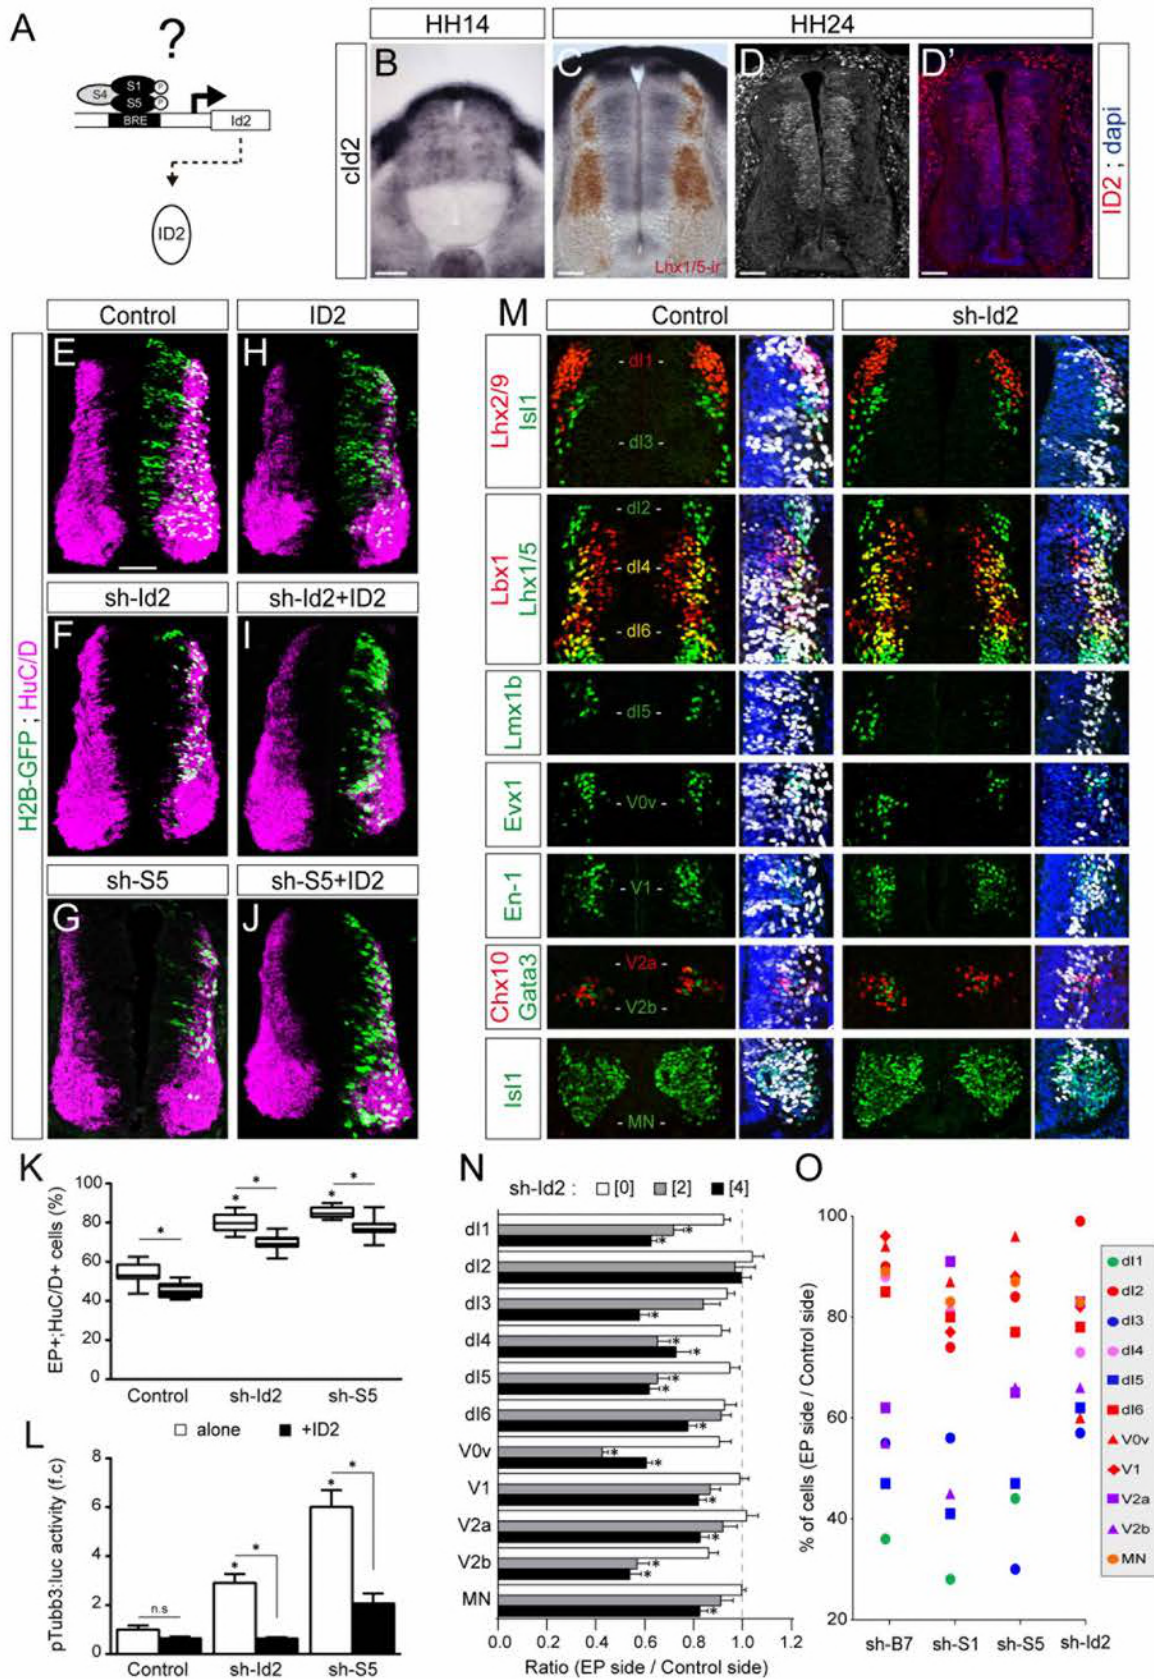

**Figure 2: ID2 acts downstream of the canonical BMP pathway and it differentially regulates the generation of spinal neurons derived from progenitors expressing ASCL1/ATOH1 or NEUROG1/NEUROG2/PTF1a.**

(A) Hypothesis: ID2 mediates the canonical BMP activity during spinal neurogenesis. (B, C) Detection of *cld2* transcripts by *in situ* hybridization in transverse spinal sections at stages HH14 (B) and HH24 (C). *Lhx1/5* immunoreactivity (brown) was detected *a posteriori* (C). (D-D') Endogenous *cld2* immunoreactivity and DAPI staining at stage HH24. (E-J) Transverse spinal cord sections of electroporated cells (H2B-GFP+) that differentiated into neurons (HuC/D+) 48 hpe with: a control plasmid (E), plasmids producing sh-RNAs against *cld2* (sh-Id2, F) or cSmad5 (sh-S5, G), a murine ID2 construct (H), and its combination with sh-Id2 (I) or sh-S5 (J). (K) Box-and-whisker plots obtained from n=7-16 embryos; one-way ANOVA + Tukey's test; \*P<0.05. (L) Activity of the pTubb3:luc reporter quantified 24 hpe in the conditions cited above, expressed as the mean fold change ± sem relative to the control, obtained from n=8-9 embryos; one-way ANOVA + Tukey's test; \*P<0.05. (M) Representative images of the spinal neuron subtypes (identified with the combinations of the markers indicated) generated 48 hpe with control or sh-Id2. (N) Mean ratios ± sem or (O) dot-plots comparing the mean number of neurons on the electroporated and contralateral sides, obtained from n=8-11 embryos; one-way ANOVA + Tukey's test; \*P<0.05. Scale bars, 50 μm. The following figure supplements are available for figure 2:

Figure supplement 1: Regulation of ID2 expression by the canonical BMP pathway.

Figure supplement 2: Modulation of ID2 activity *in vivo*.



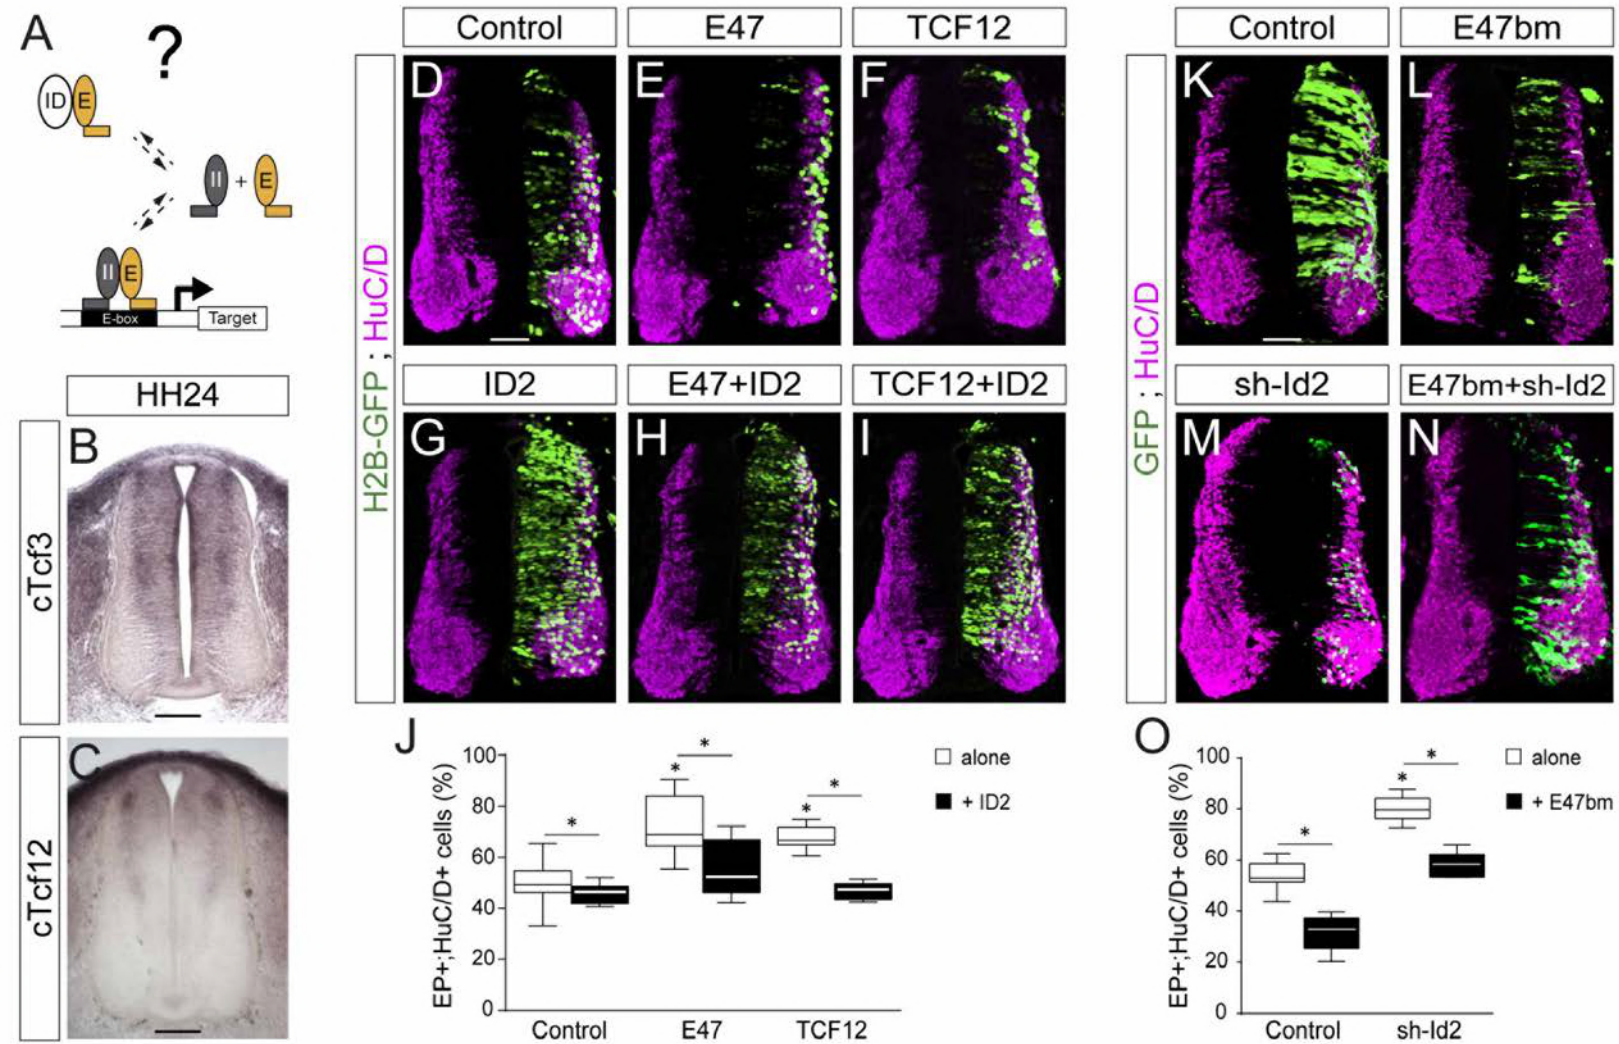

**Figure 3: ID2 and E proteins counteract each other's activity during spinal neurogenesis.**

(A) Hypothesis: ID2 sequesters E proteins during spinal neurogenesis. (B, C) Detection of *cTcf3/cE2a* (B) and *cTcf12* (C) transcripts by *in situ* hybridization in transverse spinal cord sections at stage HH24. (D-O) Transverse spinal cord sections of electroporated cells (GFP+ or H2B-GFP+) that differentiated into neurons (HuC/D+) 48 hpe with: a control (D), E47 (E), TCF12 (F), ID2 (G) or combinations of these (H, I); a control (K), E47bm (L), sh-Id2 (M) or their combination (N). (J, O) Box-and-whisker plots obtained from n=7-16 (J) and n=9-16 (O) embryos; one-way ANOVA + Tukey's test; \*P<0.05. Scale bars, 50  $\mu$ m. The following figure supplement is available for figure 3:

Figure supplement 1: E47bm rescues the premature neuronal differentiation caused by both E47 and TCF12.



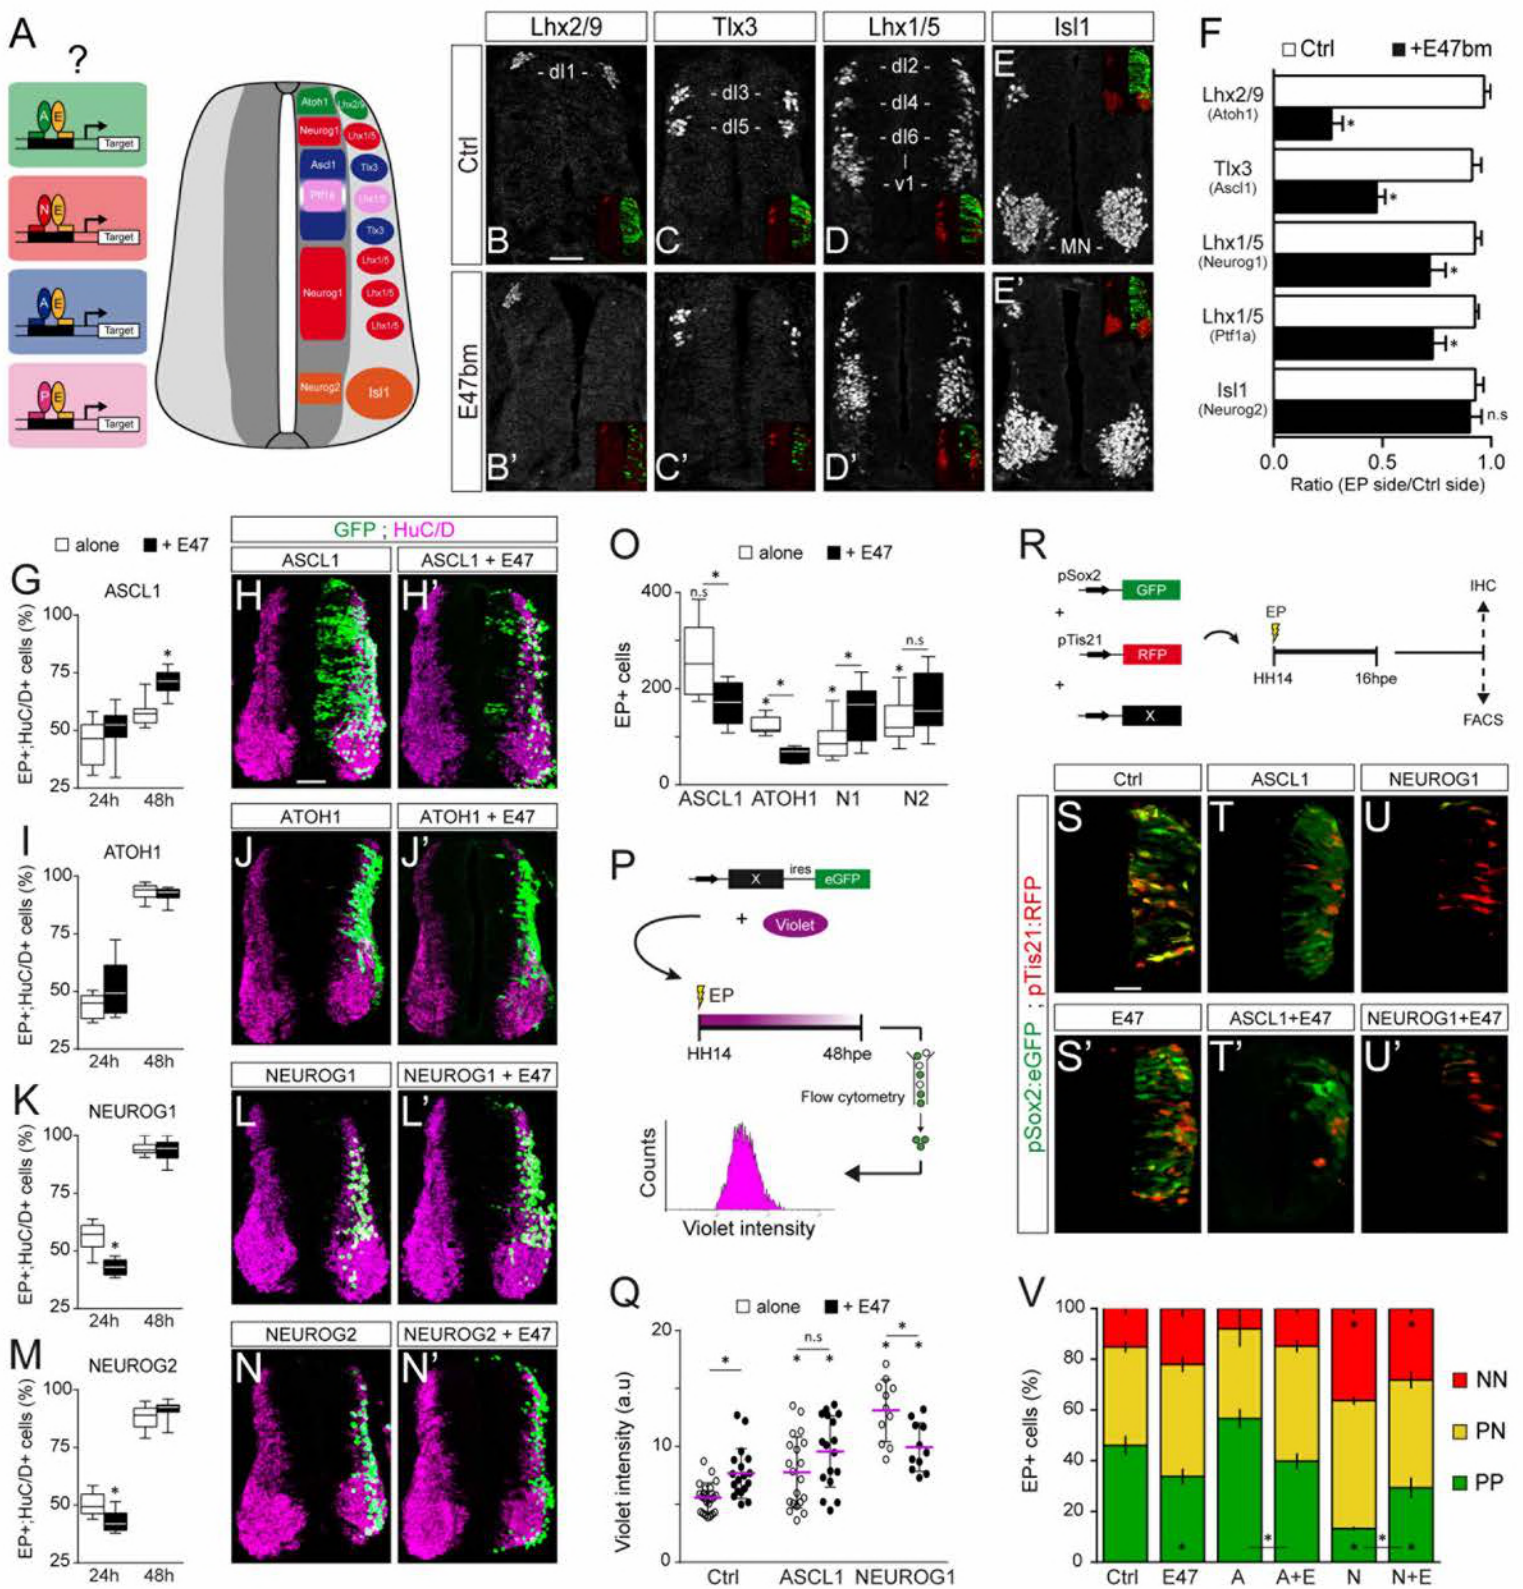

**Figure 4: E47 co-operates with ASCL1/ATOH1 and NEUROG1/NEUROG2 distinctly to fine-tune neurogenic divisions during spinal neurogenesis.**

(A) Hypothesis: E proteins co-operate with the distinct proneural proteins during spinal neurogenesis. (B-E) Representative images of spinal neurons expressing Lhx2/9 (dl1, B-B'), Tlx3 (dl3/dl5, C-C'), Lhx1/5 (dl2/dl4/dl6-V1, D-D') or Isl1 (MN, E-E'), 48 hpe with a control (B-E) or E47bm (B'-E'). (F) Mean ratios  $\pm$  sem of neuron numbers on the electroporated side relative to the contralateral side, obtained from n=8-13 embryos; two-sided unpaired t-test; \*P<0.05. (G-N') Transverse spinal cord sections of electroporated cells (GFP+ or H2B-GFP+) that differentiated into neurons (HuC/D+) 24 and 48 hpe with ASCL1 (G-H), ATOH1 (I-J), NEUROG1 (K-L) or NEUROG2 (M-N) alone (white) or together with E47 (black, H'-N'). Box-and-whisker plots obtained from n=6-9 (G), 6-8 (I), 6-14 (K) and 7-12 (M) embryos; two-way ANOVA + Sidak's test; \*P<0.05. (O) Mean number  $\pm$  sem of electroporated cells quantified 48 hpe with the proneural proteins on their own (white) or together with E47 (black), obtained from 6-14 embryos; two-sided unpaired t-test; \*P<0.05. (P) Cell cycle exit assay. (Q) Mean Violet fluorescence intensity measured 48 hpe with a control, ASCL1 and NEUROG1 on their own (white) or together with E47 (black). The individual values (dots, n=11-23 embryos) and the mean (bars) are shown; one-way ANOVA + Tukey's test and two-way ANOVA+Sidak's test; \*P<0.05. (R) Assessment of the modes of division of spinal progenitors. (S-U) Transverse spinal cord sections showing the activity of the pSox2:GFP and pTis21:RFP reporters at 16 hpe, when electroporated in combination with control, ASCL1 or NEUROG1 on their own (S-U) or together with E47 (S'-U'). (V) Mean proportion  $\pm$  sem of cells identified as pSox2+/pTis21- (PP), pSox2+/pTis21+ (PN) or pSox2-/pTis21+ (NN) when quantified by FACS, obtained from n=6-10 pools of embryos; two-way ANOVA + Tukey's test; \*P<0.05. Scale bars, 50  $\mu$ m. The following figure supplement is available for figure 4: Figure supplement 1: Effects of E47 and proneural proteins on spinal neuronal differentiation.



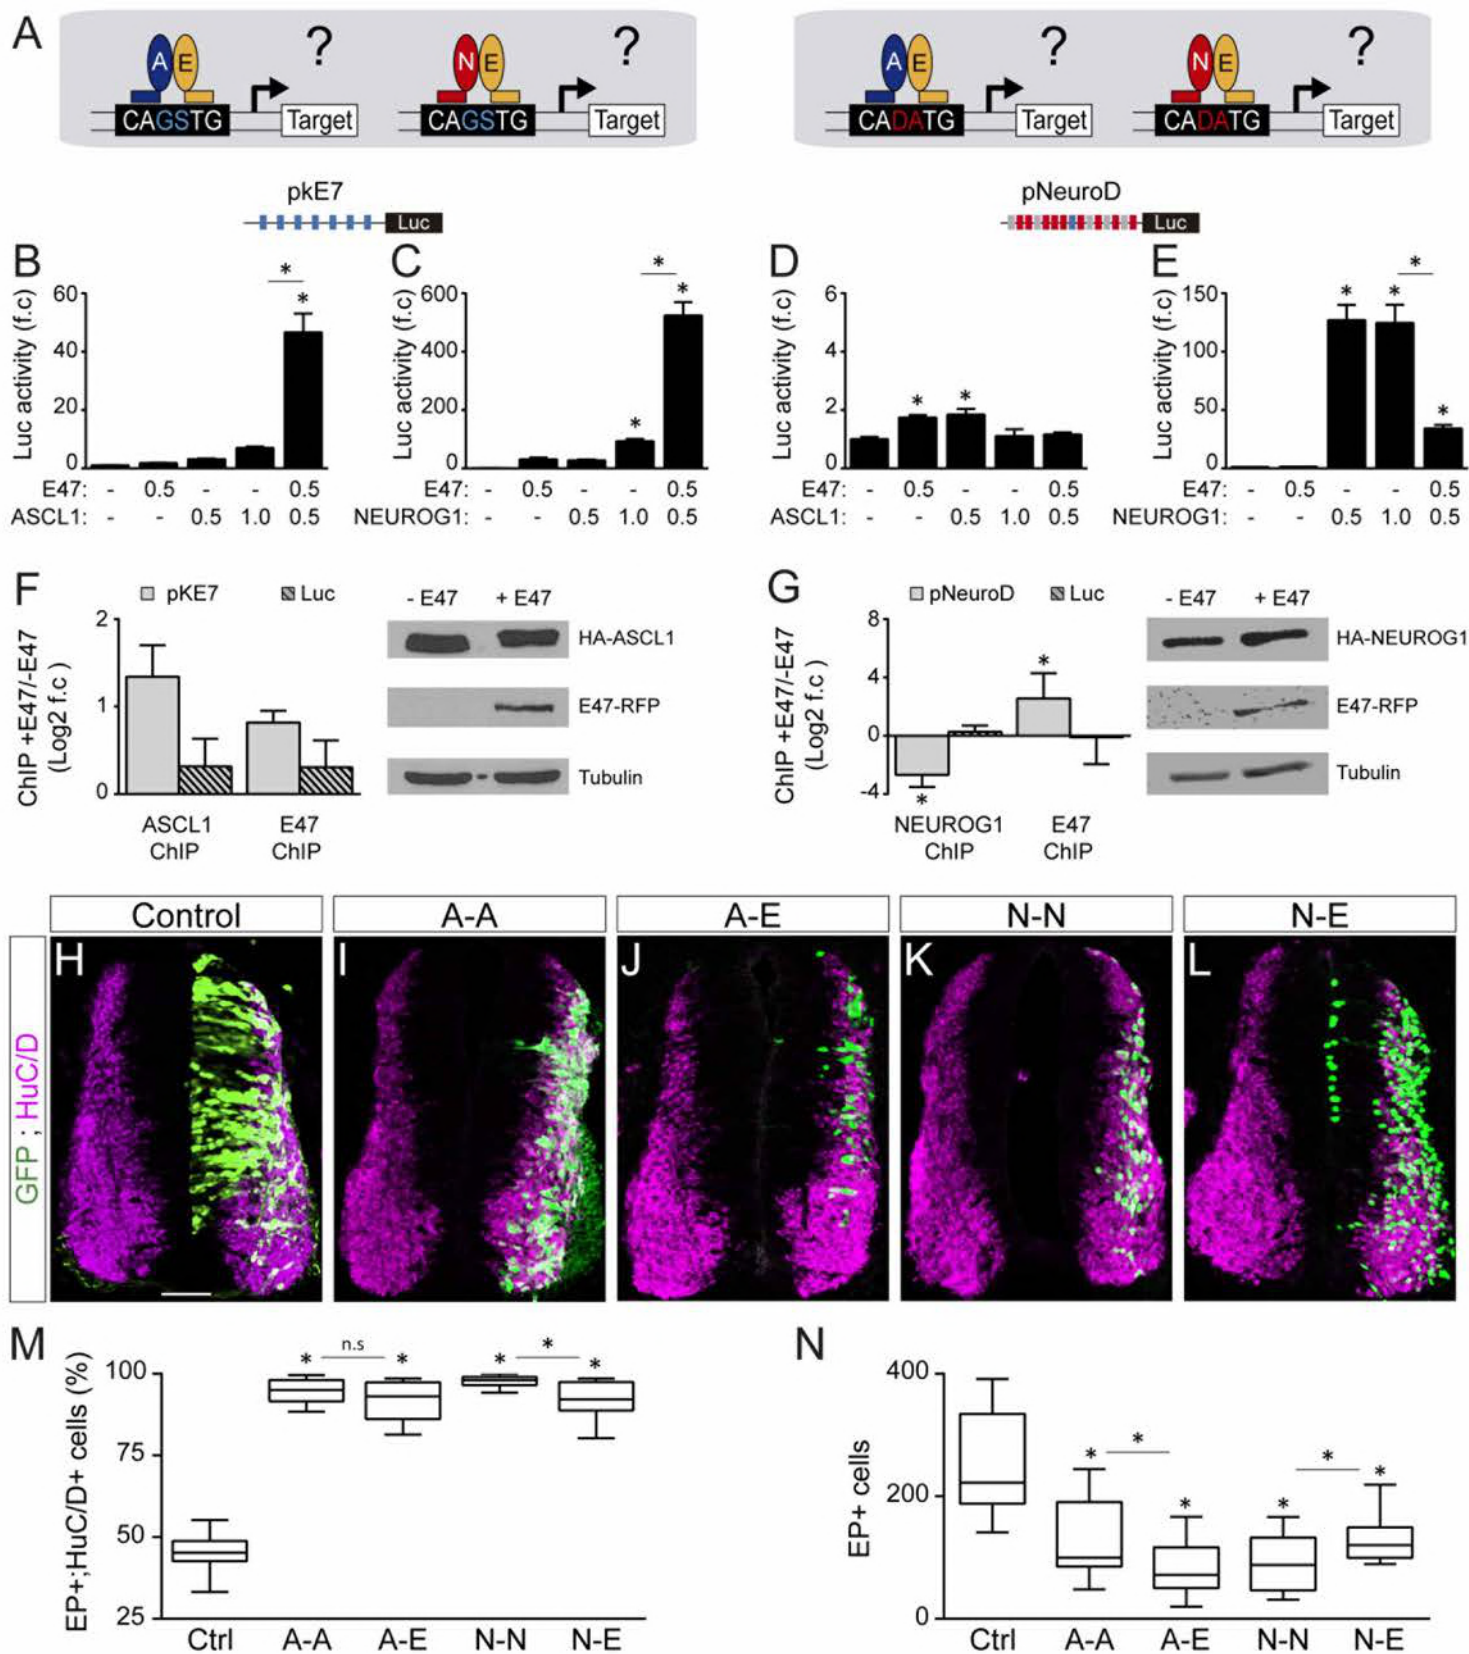

**Figure 5: E47 co-operates with ASCL1 and NEUROG1 in an E-box dependent manner and through physical interactions.**

(A) Hypothesis: E proteins co-operate differently with proneural proteins in different E-box contexts. (B-E) Activity of the pKE7 (B, C) and pNeuroD (D, E) luciferase reporters measured 24 hpe with a control, E47 and ASCL1 (B, D) or NEUROG1 (C, E), expressed as the mean fold change  $\pm$  sem relative to the control, obtained from  $n=8$  embryos; one-way ANOVA + Tukey's test; \* $P<0.05$ . (F-G) ChIP assays performed on the pKE7 (F) or pNeuroD (G) promoter regions (light grey), or luciferase ORF (Luc, striped grey), in HEK293 cells 24 hours after transfection with HA-ASCL1 (F) or HA-NEUROG1 (G) on their own or together with E47-RFP, expressed as Log<sub>2</sub> values of the mean fold change  $\pm$  sem in DNA binding measured in the presence of E47 relative to absence of E47, obtained from  $n=3$  (F) or  $n=5$  (G) experiments; two-sided one sample t-test; \* $P<0.05$ . The HA-ASCL1, HA-NEUROG1 and E47-RFP proteins probed in Western blots, with Tubulin-beta as a transfection control. (H-L) Transverse spinal cord sections of electroporated cells (GFP+) that differentiated into neurons (HuC/D+) 48 hpe with a control (H), ASCL1 or NEUROG1 homodimer (A-A, I; N-N, K), or ASCL1-E47 or NEUROG1-E47 heterodimers (A-E, J; N-E, L). (M) Box-and-whisker plots obtained from  $n=12-15$  embryos; one-way ANOVA + Tukey's test; \* $P<0.05$ . (N) Mean number of electroporated cells (GFP+) generated 48 hpe in the conditions cited above, calculated from  $n=11-14$  embryos; one-way ANOVA + Tukey's test; \* $P<0.05$ . The following figure supplements are available for figure 5:

Figure supplement 1: The ability of NEUROG1 to induce spinal neuronal differentiation depends on its DNA-binding.

Figure supplement 2: E-box dependent activity of E47, ASCL1 and NEUROG1 during spinal neurogenesis.

Figure supplement 3: Characterization of the tethered constructs of bHLH dimers.



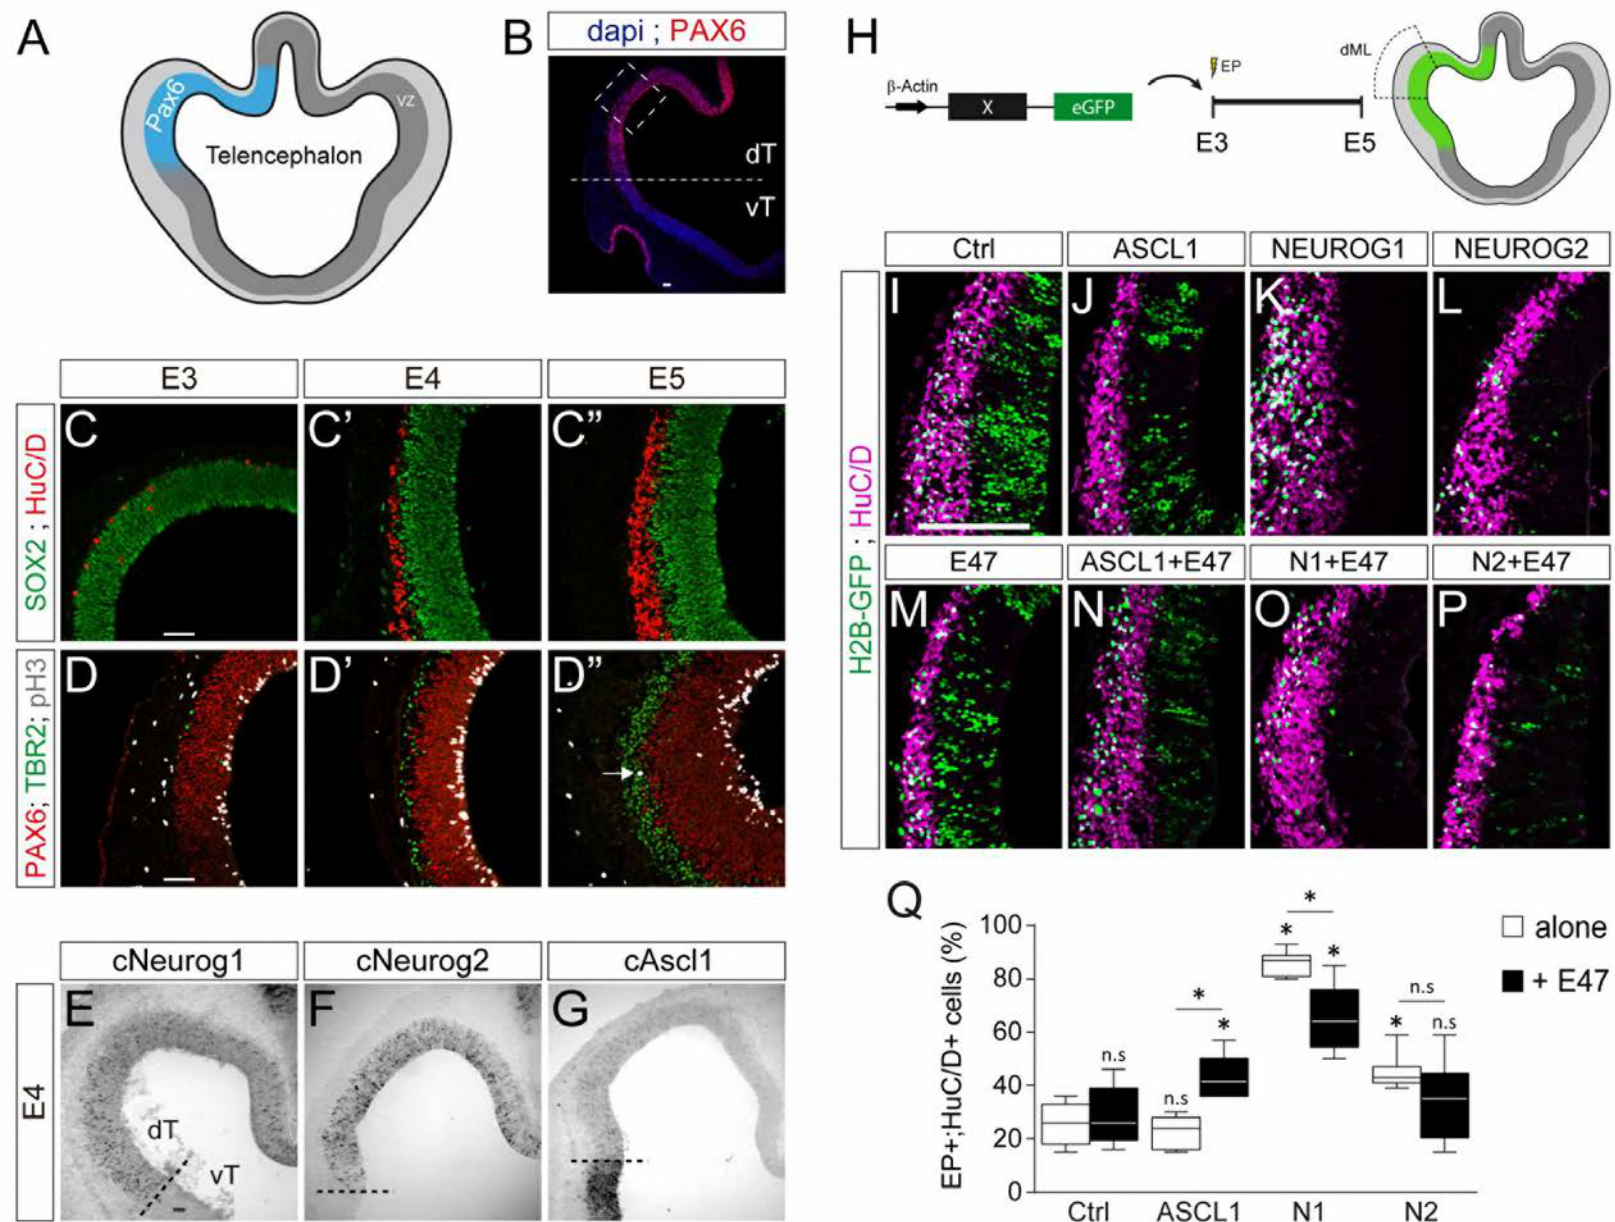

**Figure 6: E47 co-operates differentially with ASCL1 and NEUROG1/NEUROG2 during corticogenesis.**

(A) Scheme of the embryonic chick telencephalon at early stages of neurogenesis. (B-D) Coronal telencephalic sections showing PAX6 immunoreactivity and the cell nuclei (DAPI) at low magnification at E4 (B), cortical progenitors and differentiating neurons (SOX2+ and HuC/D+, C), apical progenitors (PAX6+;TBR2-, D) and mitotic basal progenitors (TBR2+;pH3+, arrow in D'') at E3 (C, D), E4 (C', D') and E5 (C'', D''). (E-G) Detection of *cNeurog1* (E), *cNeurog2* (F) and *cAscl1* (G) transcripts by *in situ* hybridization at E4. (H) *In ovo* electroporation of the chick telencephalon. (I-P) Coronal telencephalic sections of electroporated cells (GFP+) that differentiated into neurons (HuC/D+) 48 hpe with a control (I), ASCL1 (J), NEUROG1 (K) or NEUROG2 (L) on their own or together with E47 (M-P). (Q) Box-and-whisker plots obtained from n=5-9 embryos; one-way ANOVA + Tukey's test; \*P<0.05. Scale bars, 50  $\mu$ M. dT/vT, dorsal and ventral telencephalon; dML, dorso-medial-lateral; VZ, ventricular zone.

The following figure supplement is available for figure 6:

Figure supplement 1: Neurogenesis and concentration dependent effects of proneural proteins during early chick corticogenesis.

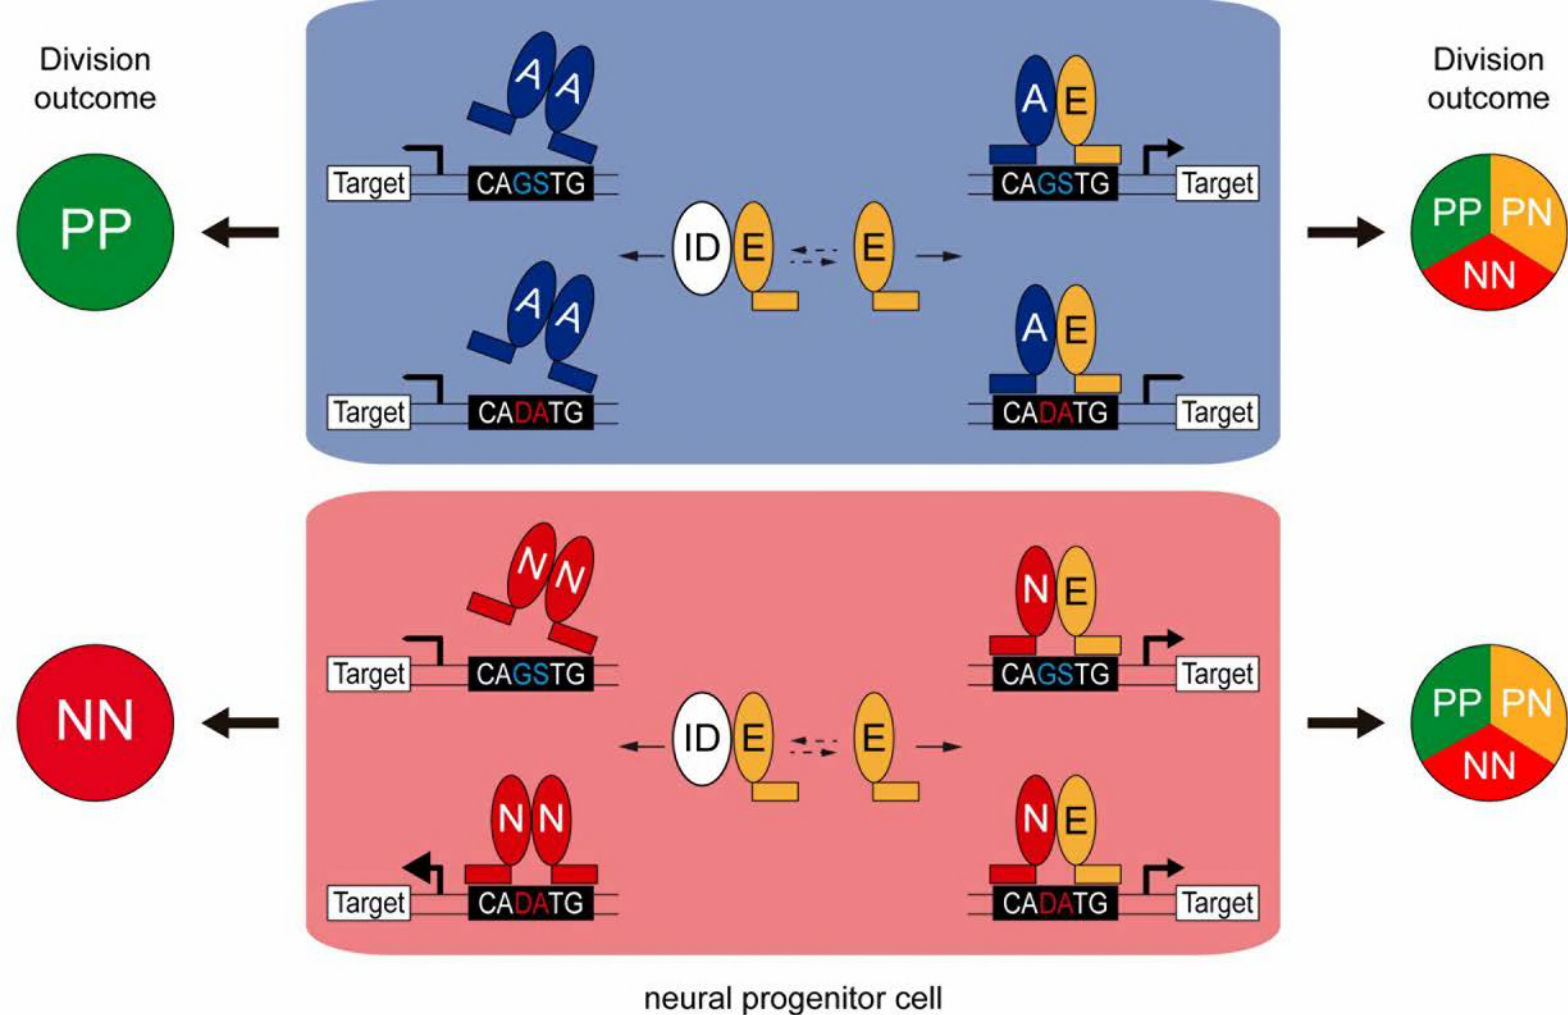

neural progenitor cell

**Figure 7: Model of the dual co-operation of E proteins with proneural proteins.**

In neural progenitors, ID proteins (ID) physically sequester E proteins (E), thereby regulating their ability to interact with ASCL1 and ATOH1 (A) or NEUROG1/2 (N). When E protein availability is limited, ASCL1/ATOH1 cannot bind optimally to high affinity CAGSTG E-box motifs, resulting in poor regulation of their target genes and favouring symmetric proliferative (PP) divisions and hence, progenitor maintenance. The release of E proteins from IDs allows heterodimerization with ASCL1/ATOH1, resulting in optimal binding to CAGSTG motifs, correct regulation of the target genes and the appropriate increase in neurogenic asymmetric (PN) and self-consuming (NN) divisions. In the absence of E proteins, NEUROG1/2 bind to high affinity CADATG motifs, possibly as homodimers, and regulate the expression of target genes in an exacerbated manner. This deregulation results in excessive neurogenic divisions that cause premature neuronal differentiation and depletion of the progenitor pool. In the presence of E proteins and when N-E heterodimers are formed, the activity of NEUROG1/2 is moderated and the proportions of the different modes of divisions are balanced appropriately to sustain the progenitor population while promoting correct neuronal differentiation.



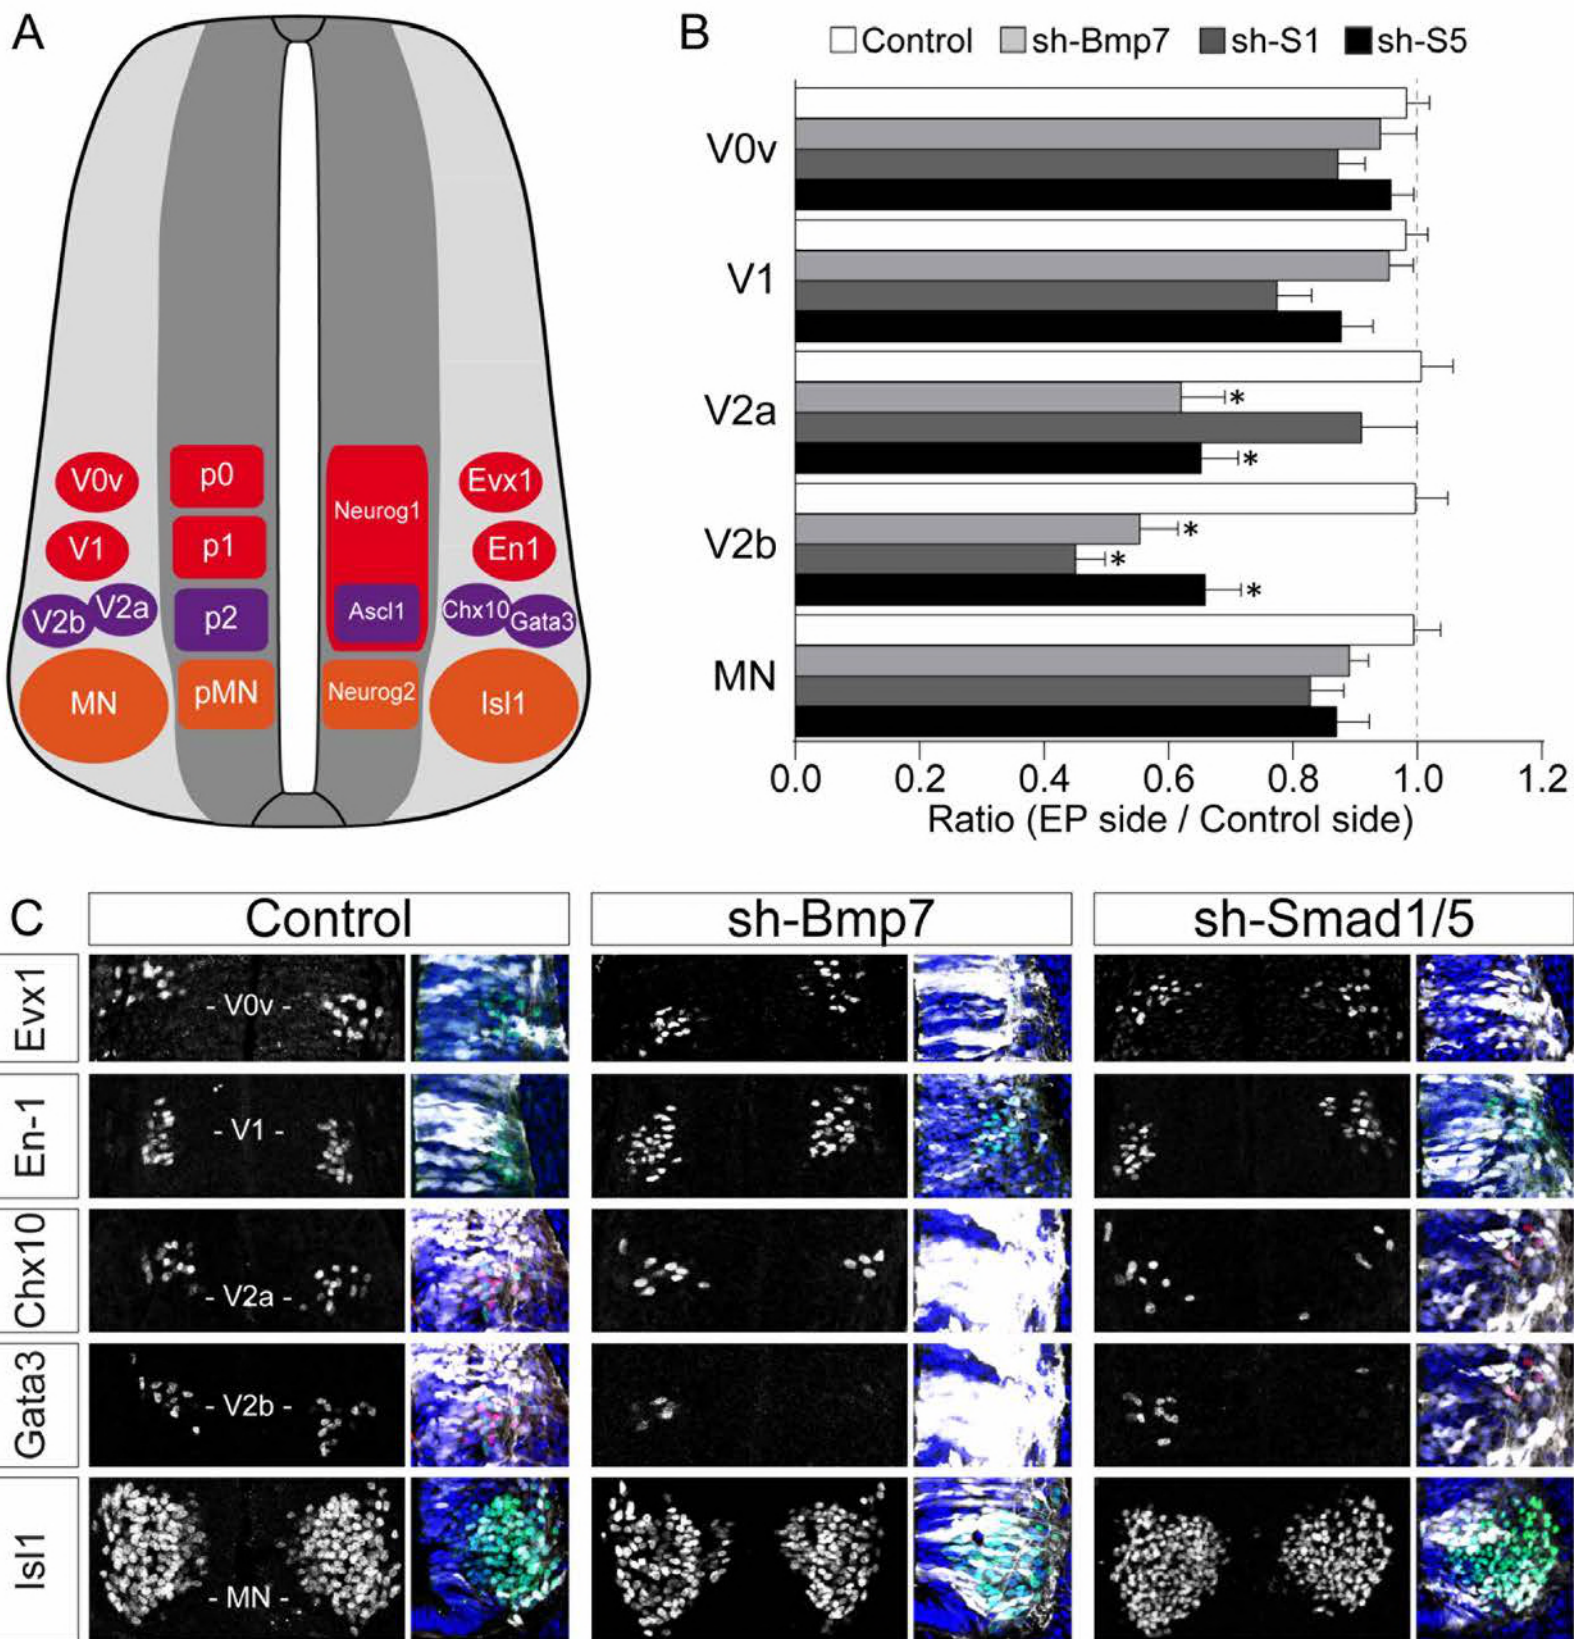

**Figure 1-figure supplement 1: Inhibiting the canonical BMP pathway affects the generation of ventral spinal neurons.**

(A) Diagram of a transverse section of the developing spinal cord at mid-neurogenesis, highlighting the ventral neuron subtypes analysed and the markers used to identify them. (B, C) The proportions (B) and representative images (C) of the ventral spinal neuron subtypes generated 48 hours after in ovo electroporation with a control plasmid or plasmids producing sh-RNAs specifically targeting cBmp7 (sh-Bmp7), cSmad1 (sh-Smad1) or cSmad5 (sh-Smad5). GFP staining (white) and DAPI (blue) are shown to confirm the region of interest was electroporated. The data are presented as the mean ratios  $\pm$  sem obtained from n=6-17 embryos per condition; one-way ANOVA + Tukey's test; \*P<0.05.

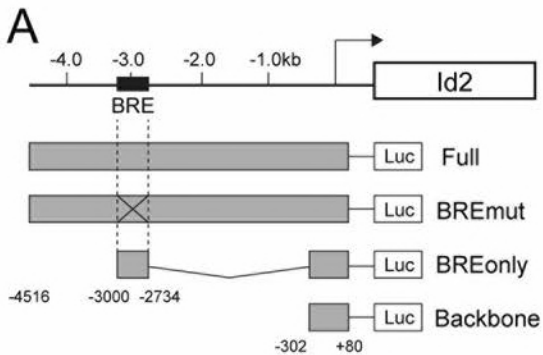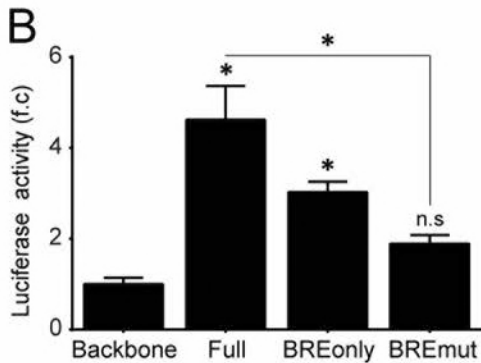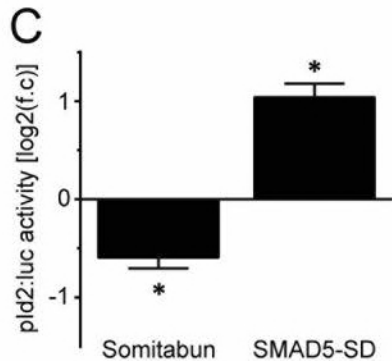

**Figure 2-figure supplement 1: Regulation of ID2 expression by the canonical BMP pathway.**

(A) Representation of the proximal murine *Id2* promoter region and different mutant constructs of *pld2:luc* reporters, highlighting the location of the SMAD1/5/8-responsive (BRE) elements. (B) Transcriptional assay showing the activity of the different *pld2:luc* reporters measured 24 hpe. The data are expressed as the mean fold change  $\pm$  sem relative to the control values, obtained from  $n=7-8$  embryos per condition; one-way ANOVA + Tukey's test; \* $P<0.05$ . (C) Transcriptional assay showing the activity of the full *pld2:luc* reporter measured 24 hpe with dominant-negative (Somitabun) or constitutively active (SMAD5-SD) SMAD5 mutant constructs. The data are expressed as the mean Log<sub>2</sub> fold changes  $\pm$  sem relative to the control values, obtained from  $n=7-10$  embryos; two-sided unpaired t-test; \* $P<0.05$ .



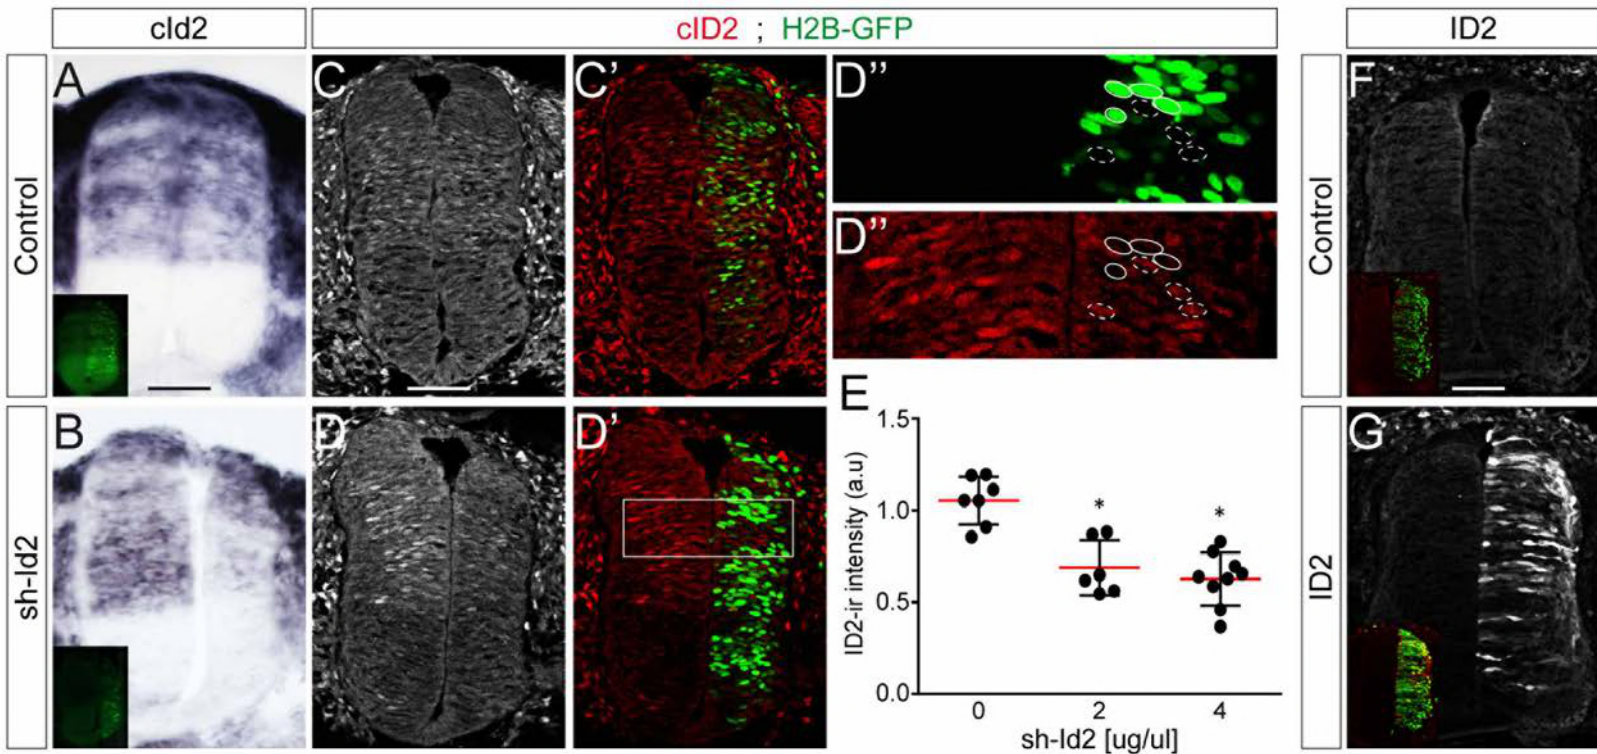

**Figure 2-figure supplement 2: Modulation of ID2 activity *in vivo*.**

(A-B) Detection of *cld2* transcripts by in situ hybridization in transverse spinal sections 24 hpe with control (A) or sh-Id2-producing (B) plasmids. (C-D) Endogenous cID2 immunoreactivity detected in transverse spinal sections 24 hpe with control (C, C') or sh-Id2-producing (D-D'') plasmids, and quantified in electroporated and nearby non-electroporated cells (as highlighted in D''). (E) The data represent the mean cID2 immunoreactivity  $\pm$  sd measured after electroporation of a control plasmid [0] or increasing concentrations [2 and 4  $\mu\text{g}/\mu\text{l}$ ] of sh-Id2 plasmids in electroporated relative to non-electroporated cells, obtained from n=6-9 embryos per condition; one-way ANOVA + Tukey's test; \*P<0.05. (F-G) ID2 immunoreactivity in transverse spinal sections 24 hpe with a control plasmid (F) or overexpression of a murine ID2 construct (G). Scale bars, 50  $\mu\text{M}$ .

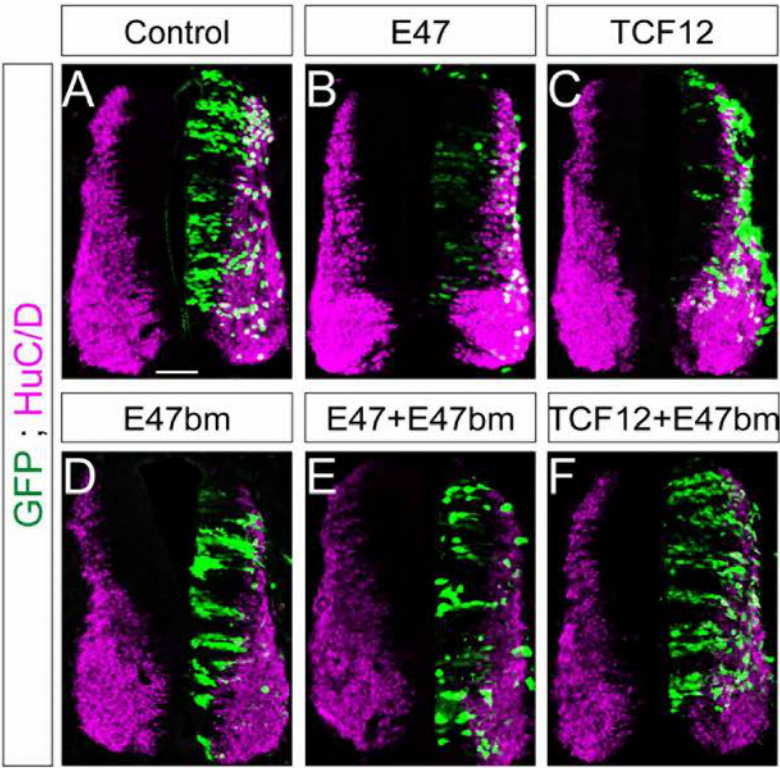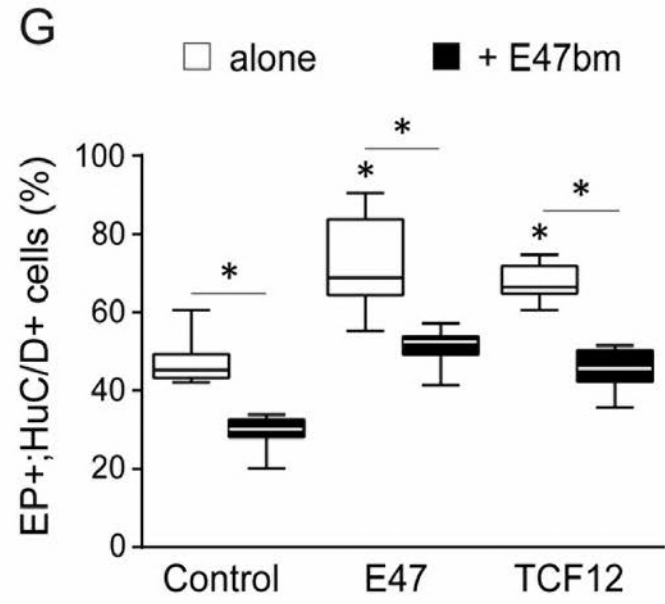

**Figure 3-figure supplement 1: E47bm rescues the premature neuronal differentiation caused by both E47 and TCF12.** (A-F) Transverse spinal cord sections of electroporated cells (GFP+) that had differentiated into neurons (HuC/D+) 48 hpe with a control (A), E47 (B), TCF12 (C), E47bm (D) construct or combinations thereof (E, F). (G) The box-and-whisker plots show the proportion obtained from n=7-14 embryos per condition; one-way ANOVA + Tukey's test; \*P<0.05. Scale bars, 50 μm.

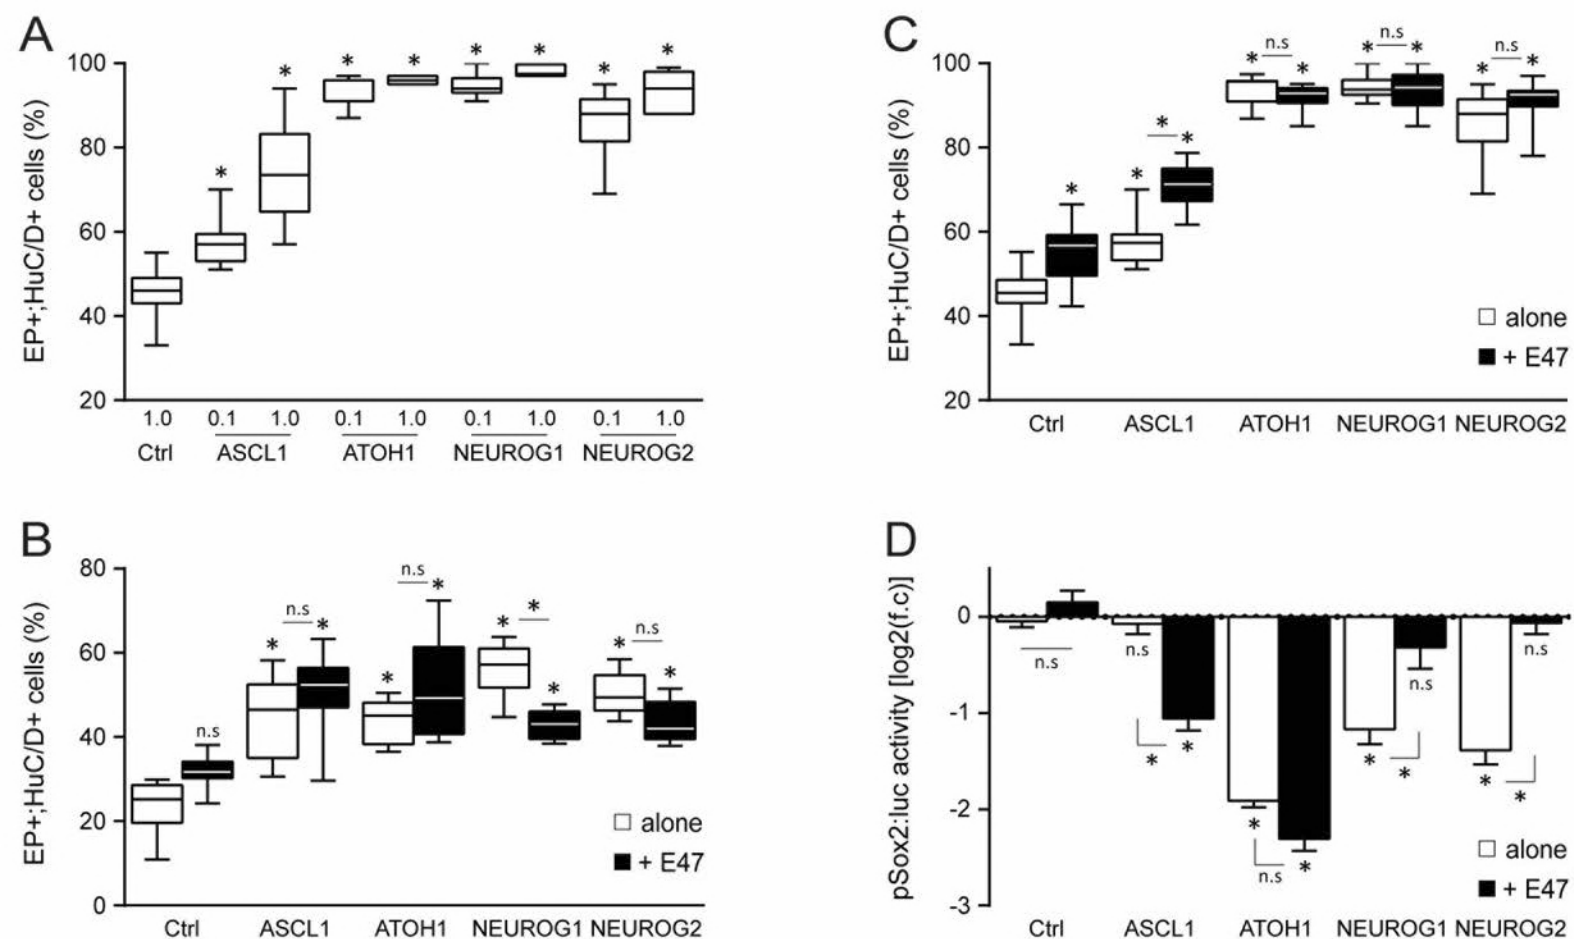

**Figure 4—figure supplement 1: Effects of E47 and proneural proteins on spinal neuronal differentiation.**

(A) Box-and-whisker plots showing the proportion of electroporated cells (GFP+) that differentiated into neurons (HuC/D+) 48 hpe with increasing concentrations [0.1 or 1 µg/µl] of ASCL1, ATOH1, NEUROG1 or NEUROG2, from n=7-13 embryos per condition; one-way ANOVA + Tukey's test; \*P<0.05. (B, C) Proportion of electroporated cells (GFP+) that differentiated into neurons (HuC/D+) 24 (B) or 48 (C) hpe with control, ASCL1, ATOH1, NEUROG1 or NEUROG2 alone (white whiskers) or together with E47 (black whiskers), obtained from n=6-13 embryos; one-way ANOVA + Tukey's test; \*P<0.05. (D) Transcriptional assay showing the activity of a pSox2:luc reporter measured 24 hpe with control, ASCL1, ATOH1, NEUROG1 or NEUROG2 alone (white whiskers) or together with E47 (black whiskers). The data are expressed in Log<sub>2</sub> as the mean fold change ± sem relative to the control values, obtained from n=6-19 embryos per condition; one-way ANOVA + Tukey's test; \*P<0.05.



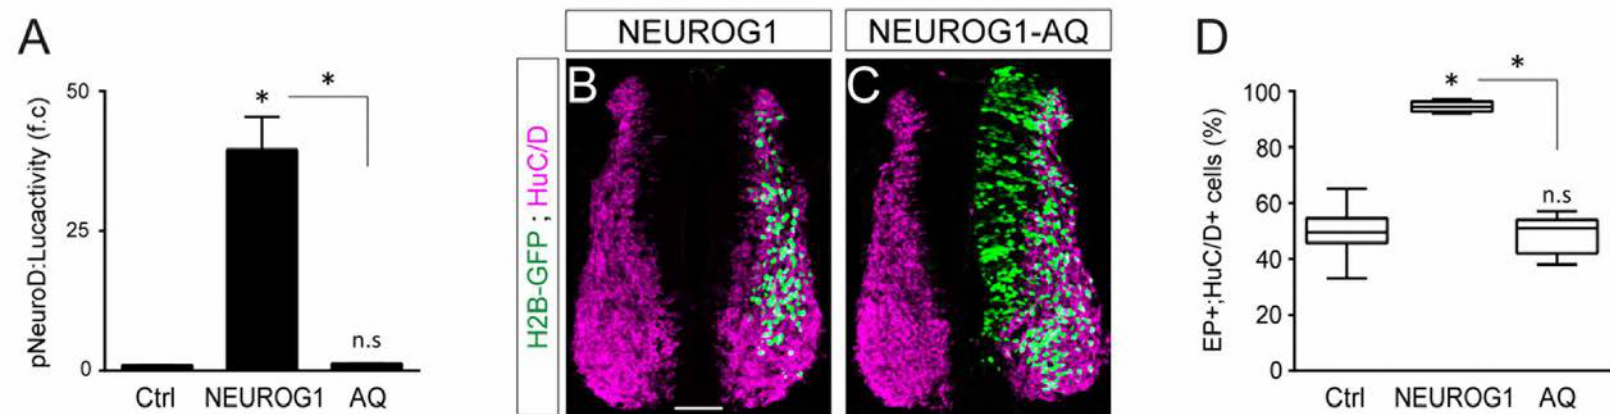

**Figure 5–figure supplement 1: The ability of NEUROG1 to induce spinal neuronal differentiation depends on its DNA-binding.**

(A) Transcriptional assay showing the activity of the pNeuroD:luc reporter measured 24 hpe with control or myc-tagged wild-type NEUROG1 construct and the NEUROG1-AQ mutant, obtained from n=6 embryos per condition; Kruskal-Wallis + Dunn' test; \*P<0.05. (B, C) Transverse spinal cord sections of electroporated cells (H2B-GFP+) that differentiated into neurons (HuC/D+) 48 hpe with NEUROG1 (B) or NEUROG1-AQ (C). (D) Box-and-whisker plots showing the proportion obtained from n=6-7 embryos per condition; Kruskal-Wallis + Dunn' test; \*P<0.05. Scale bars, 50  $\mu$ M.



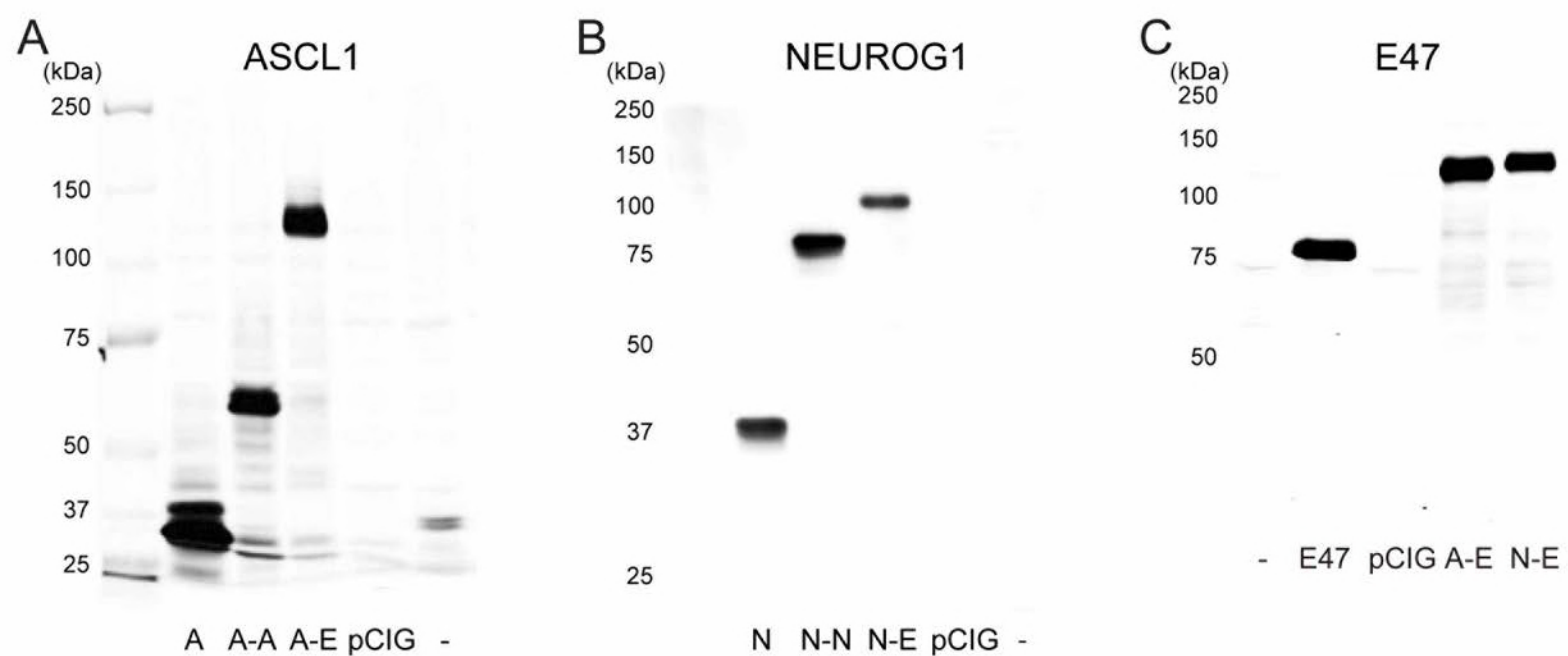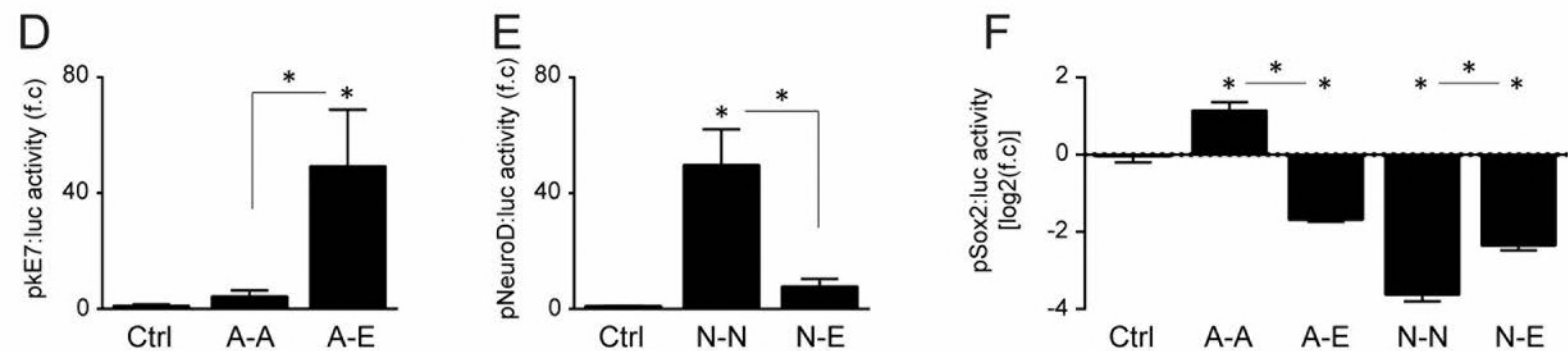

**Figure 5—figure supplement 3: Characterization of the tethered constructs of bHLH dimers.**

(A-C) Western blot detection of monomeric and dimeric ASCL1 (A), NEUROG1 (B) and E47 (C) constructs in protein extracts obtained 24 hours after transfecting HEK293 cells with constructs encoding ASCL1, NEUROG1 and E47 monomers (A, N, E), homo- and heterodimers (A-A, A-E, N-N, N-E), a control plasmid (pCIG), or non-transfected cells (-). (D-F) Transcriptional assays show the activity of the pKE7 (D), pNeuroD (E) and pSox2 (F) luciferase reporters measured 24 hpe with controls, ASCL1 (A-A) and NEUROG1 (N-N) homodimers, and ASCL1-E47 (A-E) and NEUROG1-E47 (N-E) heterodimers. The data are expressed as the mean (D, E) or Log2 fold changes (F)  $\pm$  sem relative to the control values, obtained from  $n=4-6$  (D), 11-12 (E) or 6 (F) embryos per condition; Kruskal-Wallis + Dunn' test or one-way ANOVA + Tukey's test; \* $P<0.05$ .

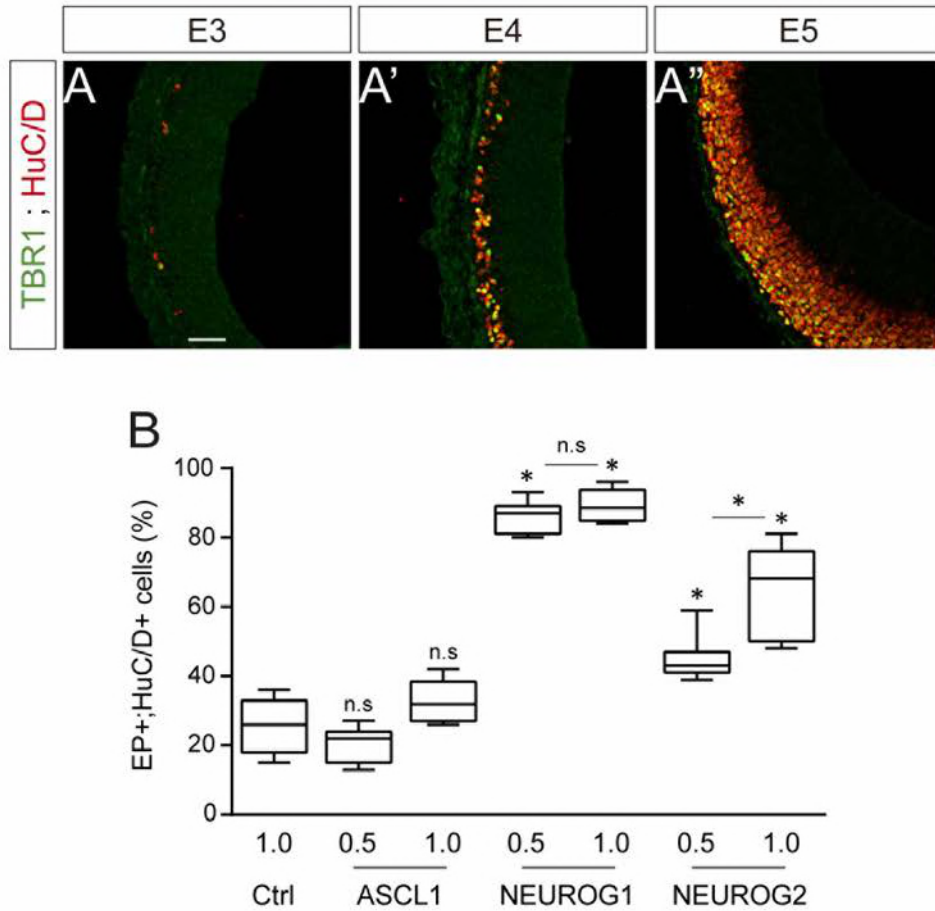

**Figure 6–figure supplement 1: Neurogenesis and concentration dependent effects of proneural proteins during early chick corticogenesis.**

(A) Coronal telencephalic sections showing TBR1 immunoreactivity in differentiating neurons (HuC/D+) that are generated during early corticogenesis in chick, at E3 (A), E4 (A') and E5 (A''). (B) Proportion of electroporated cells (GFP+) that differentiated into neurons (HuC/D+) 48 hpe with increasing concentrations [0.5 or 1 µg/µl] of the ASCL1, NEUROG1 or NEUROG2 constructs. Data were obtained from n=6-9 embryos per condition; one-way ANOVA + Tukey's test; \*P<0.05. Scale bar, 50 µM.
